# Supplementary material for: Charge-dependent modulation of S–H vs. O–H excited-state intramolecular proton transfer
Source: Royal Society of Chemistry journal article supplement (doi:10.1039/d5sc10166b), 2026-04-07
Supplement: d5sc10166b1.pdf [file d5sc10166b1.pdf]

## Supporting Information

### Charge-Dependent Modulation of S–H vs O–H Excited-State Intramolecular Proton Transfer

Chi-Chi Wu,<sup>1#</sup> Hao-Cheng Tsai,<sup>1#</sup> Hau-Yu Liu,<sup>1</sup> Ya-Chen Lin,<sup>1</sup> Chih-Hsing Wang,<sup>1</sup> Alexander P. Demchenko,<sup>2</sup> Chao-Tsen Chen,<sup>\*1</sup> Pi-Tai Chou<sup>\*1</sup>

<sup>1</sup>Department of Chemistry, National Taiwan University, Taipei, 10617, Taiwan, R.O.C.

<sup>2</sup>Institute of Physical, Technical and Computer sciences, Yuriy Fedkovych National University, Chernivtsi, 58002, Ukraine.

# equal contribution

#### Experimental Information

##### 1. General Experimental Section

All chemicals were purchased from commercial sources and used as received. Solvents used for syntheses were used without drying. Merck silica gel 60 F254 was used as TLC plate, visualized by UV light. <sup>1</sup>H (400 MHz) and <sup>13</sup>C (100 MHz) spectra were recorded on a Bruker AVIII 400 spectrometer. Chemical shifts are reported relative to CDCl<sub>3</sub> (7.24 ppm for <sup>1</sup>H, 77.00 ppm for <sup>13</sup>C) and quoted as  $\delta$  values in ppm. All NMR spectra are recorded at ambient temperature unless otherwise specified. The following abbreviations are used: singlet (s), doublet (d), triplet (t), quartet (q), multiplet (m), and broad (br). Melting points were determined by using the Fargo MP-1D melting point apparatus without correction. Infrared spectra were recorded on a Varian 640-IR spectrometer. Mass spectra with an electrospray ionization (ESI) were determined on a Bruker microTOFQII spectrometer.

##### 2. Experimental Procedures

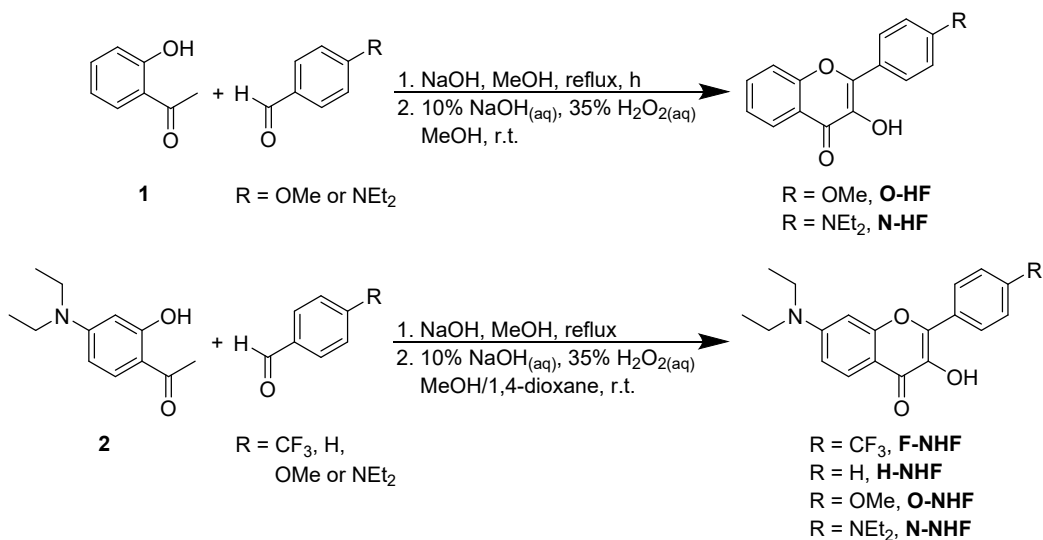

**3HFs** including **O-3HF**, **N-3HF** and all **NHFs** were synthesized *via* Claisen-Schmidt condensation followed by Algar-Flynn-Oyamada reaction under modified conditions according to reported procedures.<sup>1,2</sup>

The starting material compound **1** and all corresponding aldehydes were purchased from commercially available source. Compound **2** (1-(4-diethylamino-2-hydroxy-phenyl)ethan-1-one) was synthesized according to previously reported procedures.<sup>3</sup>

### **3-hydroxy-2-(4-methoxyphenyl)-4H-chromen-4-one (O-3HF)**

Pale yellow crystal. M.p. = 240-241 °C (lit.<sup>1</sup> 240.9-244.8 °C). <sup>1</sup>H NMR (CDCl<sub>3</sub>, 400 MHz) δ 8.25-8.20 (m, 3 H, Ph+5-flavone), 7.67 (ddd, *J* = 8.5, 7.0, 1.6 Hz, 1 H, 7-flavone), 7.56 (d, *J* = 8.4 Hz, 1 H, 8-flavone), 7.39 (ddd, *J* = 7.8, 7.3, 0.7 Hz, 1 H, 6-flavone), 7.04 (d, *J* = 9.1 Hz, 2 H, Ph), 6.93 (br, 1 H, -OH), 3.88 (s, 3 H, -OMe). <sup>13</sup>C NMR (CDCl<sub>3</sub>, 100 MHz) δ 160.45, 154.44, 145.61, 138.14, 133.48, 129.40, 124.72, 124.47, 123.58, 121.34, 118.30, 114.04, 55.36. IR (ZnSe) 3196, 1604, 1257 cm<sup>-1</sup>. ESI-HRMS calcd. for C<sub>16</sub>H<sub>13</sub>O<sub>4</sub> (M<sup>+</sup>+1) 269.0808, found 269.0804.

### **2-(4-(diethylamino)phenyl)-3-hydroxy-4H-chromen-4-one (N-3HF)**

Yellow crystal. M.p. = 162-163 °C (lit.<sup>2</sup> 151-152 °C). <sup>1</sup>H NMR (CDCl<sub>3</sub>, 400 MHz) δ 8.21 (d, *J* = 7.4 Hz, 1 H, 5-flavone), 8.15 (d, *J* = 9.0 Hz, 2 H, Ph), 7.62 (dd, *J* = 7.2, 7.2 Hz, 1 H, 7-flavone), 7.53 (d, *J* = 8.3 Hz, 1 H, 8-flavone), 7.36 (dd, *J* = 7.3, 7.3 Hz, 1 H, 6-flavone), 6.88 (br, 1 H, -OH), 6.75 (d, *J* = 9.0, 2 H, Ph), 3.43 (q, *J* = 6.9 Hz, 4 H, -NEt<sub>2</sub>), 1.21 (t, *J* = 6.9 Hz, 6 H, -NEt<sub>2</sub>). <sup>13</sup>C NMR (CDCl<sub>3</sub>, 100 MHz) δ 172.36, 155.06, 148.97, 146.82, 136.77, 132.71, 129.48, 125.20, 124.09, 120.92, 117.95, 117.22, 110.98, 44.4, 12.59. IR (ZnSe) 3279, 1597, 1200 cm<sup>-1</sup>. ESI-HRMS calcd. for C<sub>19</sub>H<sub>20</sub>O<sub>3</sub>N (M<sup>+</sup>+1) 310.1438, found 310.1438.

### **7-(Diethylamino)-3-hydroxy-2-(4-(trifluoromethyl)phenyl)-4H-chromen-4-one (F-NHF)**

Yellow solid. M.P. = 218-219 °C. <sup>1</sup>H NMR (CDCl<sub>3</sub>, 400 MHz) δ 8.33 (d, *J* = 8.3 Hz, 2 H, Ph), 8.00 (d, *J* = 9.2 Hz, 1 H, 5-flavone), 7.72 (d, *J* = 8.4 Hz, 2 H, Ph), 7.24 (br, 1 H, -OH), 6.76 (dd, *J* = 9.2, 2.4 Hz, 1 H, 6-flavone), 6.52 (d, *J* = 2.4 Hz, 1 H, 8-flavone), 3.47 (q, *J* = 7.1 Hz, 4 H, -NEt<sub>2</sub>), 1.25 (t, *J* = 7.1 Hz, 6 H, -NEt<sub>2</sub>). <sup>13</sup>C NMR (CDCl<sub>3</sub>, 100 MHz) δ 172.10, 158.22, 152.30, 140.84, 138.54, 135.21, 130.83, 130.50, 127.41, 126.74, 126.40, 125.31, 125.28, 111.03, 110.04, 95.90, 44.83, 12.51. IR (ZnSe) 3260, 1606, 1325, 1134 cm<sup>-1</sup>. ESI-HRMS calcd. for C<sub>20</sub>H<sub>19</sub>F<sub>3</sub>O<sub>3</sub>N<sub>2</sub> (M<sup>+</sup>+1) 378.1312, found 378.1311.

### **7-(Diethylamino)-3-hydroxy-2-phenyl-4H-chromen-4-one (H-NHF)**

Brownish crystal. M.P. = 155-156 °C (lit.<sup>4</sup> 153-154 °C). <sup>1</sup>H NMR (CDCl<sub>3</sub>, 400 MHz) δ 8.21 (d, *J* = 7.6 Hz, 2 H, Ph), 8.00 (d, *J* = 9.1 Hz, 1 H, 5-flavone), 7.49 (t, *J* = 7.6 Hz, 2 H, Ph), 7.40 (t, *J* = 7.3 Hz, 1 H, Ph), 6.75 (dd, *J* = 9.1, 1.7 Hz, 1 H, 6-flavone), 6.52 (d, *J* = 1.7 Hz, 1 H, 8-flavone), 3.45 (q, *J* = 7.0 Hz, 4 H, -NEt<sub>2</sub>), 1.23 (t, *J* = 6.9 Hz, 6 H, -NEt<sub>2</sub>). <sup>13</sup>C NMR (CDCl<sub>3</sub>, 100 MHz) δ 158.15, 152.00, 142.89, 137.67, 131.76, 129.34, 128.42, 127.32, 126.60, 110.78, 110.17, 96.00, 44.77, 12.51. IR (ZnSe) 3272, 1614, 1269 cm<sup>-1</sup>. ESI-HRMS calcd. for C<sub>19</sub>H<sub>20</sub>O<sub>3</sub>N (M<sup>+</sup>+1) 310.1438, found 310.1429.

### **7-(Diethylamino)-3-hydroxy-2-(4-methoxyphenyl)-4H-chromen-4-one (O-NHF)**

Yellow crystal. M.P. = 127-128 °C. <sup>1</sup>H NMR (CDCl<sub>3</sub>, 400 MHz) δ 8.16 (d, *J* = 9.0 Hz, 2 H, Ph), 7.98 (d, *J* = 9.1 Hz, 1 H, 5-flavone), 7.00 (d+br, *J* = 9.0 Hz, 2 H, Ph+OH), 6.72 (dd, *J* = 9.1, 2.4 Hz, 1 H, 6-flavone), 6.50 (d, *J* = 2.3 Hz, 1 H, 8-flavone), 3.85 (s, 3 H, -OMe), 3.43 (q, *J* = 7.1 Hz, 4 H, -NEt<sub>2</sub>), 1.22 (t, *J* = 7.1 Hz, 6 H, -NEt<sub>2</sub>). <sup>13</sup>C NMR (CDCl<sub>3</sub>, 100 MHz) δ 160.40, 157.93, 151.79, 143.21, 136.75, 128.95, 126.46, 124.28, 113.86, 110.58, 110.17, 96.02, 55.31, 44.72, 12.49. IR (ZnSe) 2980, 1604, 1258, 1175 cm<sup>-1</sup>. ESI-HRMS calcd. for C<sub>20</sub>H<sub>22</sub>O<sub>4</sub>N (M<sup>+</sup>+1) 340.1543, found 340.1533.

#### **7-(Diethylamino)-2-(4-(diethylamino)phenyl)-3-hydroxy-4H-chromen-4-one (N-NHF)**

Red crystal. M.P. = 157-158 °C. <sup>1</sup>H NMR (CDCl<sub>3</sub>, 400 MHz) δ 8.09 (d, *J* = 9.2 Hz, 2 H, Ph), 7.97 (d, *J* = 9.1 Hz, 1 H, 5-flavone), 6.92 (br, 1 H, -OH), 6.77-6.70 (m, 3 H, 6-flavone+Ph), 6.51 (d, *J* = 2.4 Hz, 1 H, 8-flavone), 3.48-3.38 (m, 8 H, -NEt<sub>2</sub>), 1.26-1.16 (m, 12 H, -NEt<sub>2</sub>). <sup>13</sup>C NMR (CDCl<sub>3</sub>, 100 MHz) δ 157.78, 151.50, 148.42, 144.84, 135.91, 132.26, 128.93, 126.35, 118.18, 111.01, 110.44, 110.33, 96.19, 44.72, 44.42, 12.60, 12.54. IR (ZnSe) 2980, 1600, 1184 cm<sup>-1</sup>. ESI-HRMS calcd. for C<sub>23</sub>H<sub>29</sub>O<sub>3</sub>N<sub>2</sub> (M<sup>+</sup>+1) 381.2173, found 381.2182.

### 3. $^1\text{H}$ NMR and $^{13}\text{C}$ NMR spectra of 3HFs, NHFs, and $^{19}\text{F}$ spectrum of F-NHF

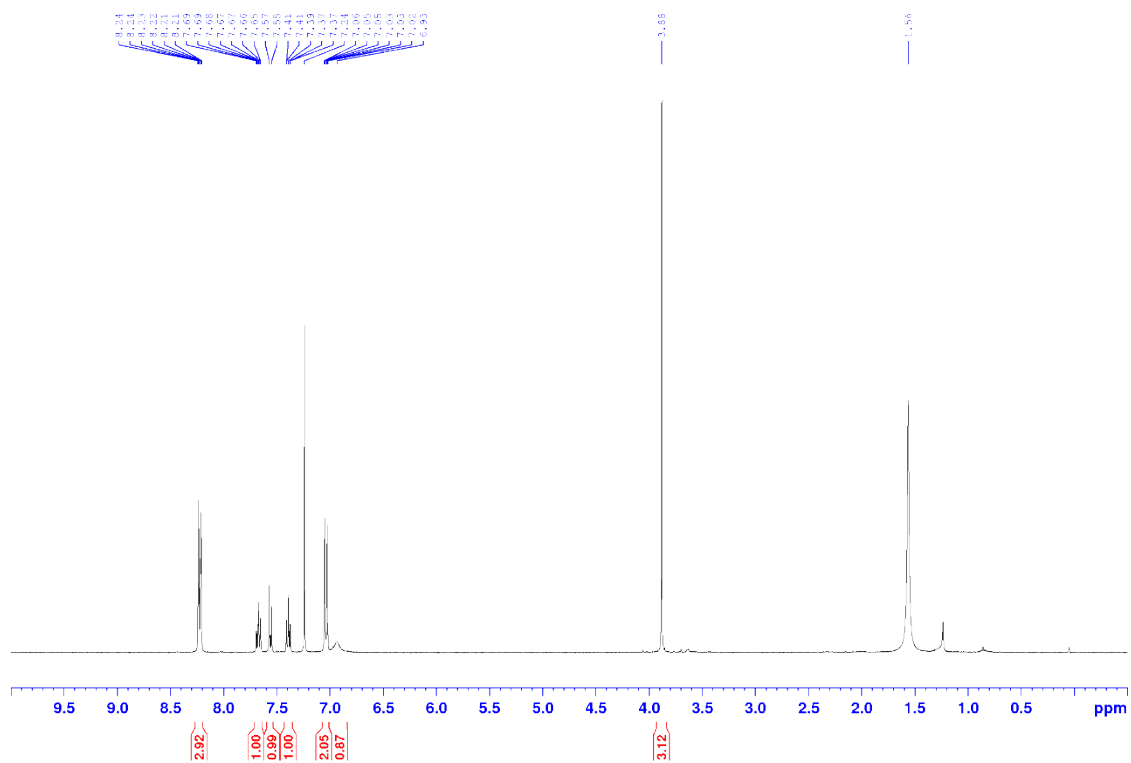

Figure S1.  $^1\text{H}$  NMR of O-3HF in  $\text{CDCl}_3$ .

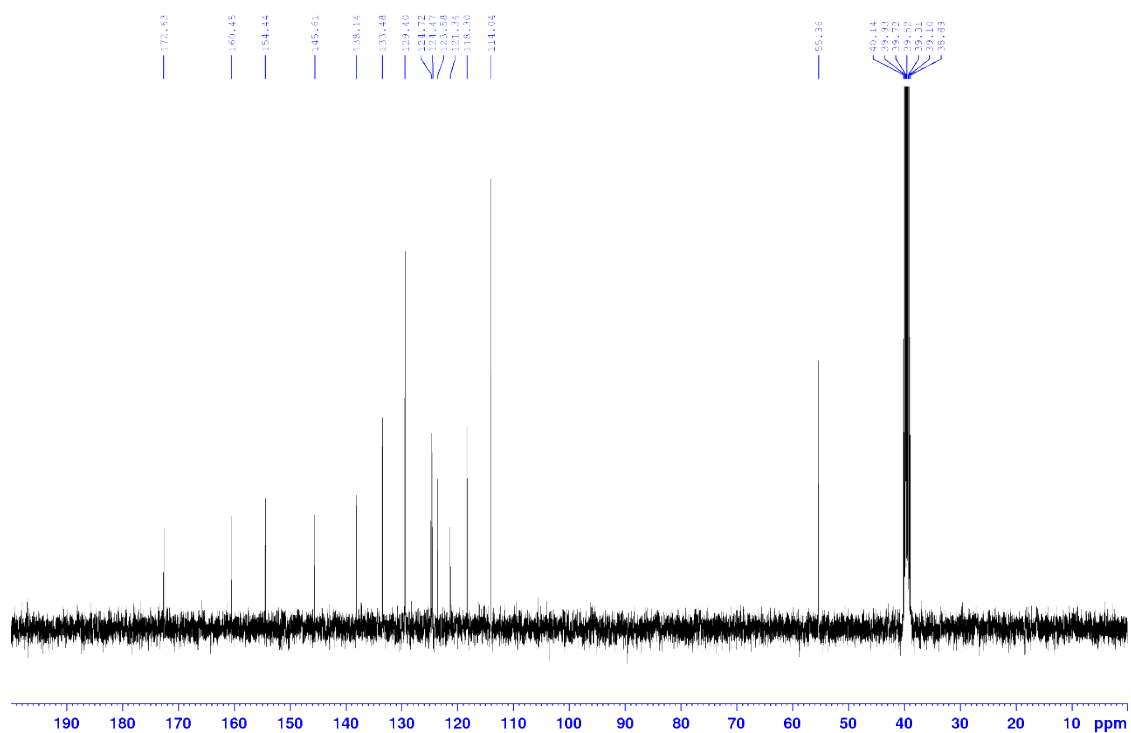

Figure S2.  $^{13}\text{C}$  NMR of O-3HF in  $\text{DMSO-}d_6$ .



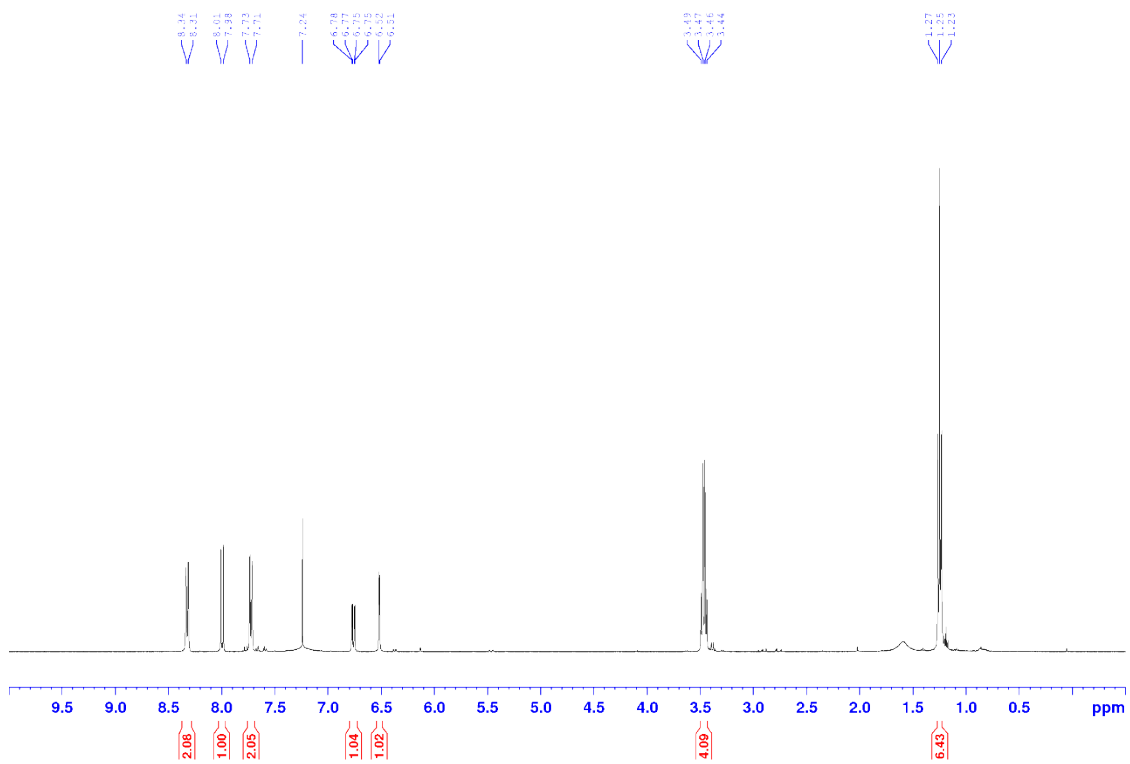

Figure S5.  $^1\text{H}$  NMR of F-NHF in  $\text{CDCl}_3$ .

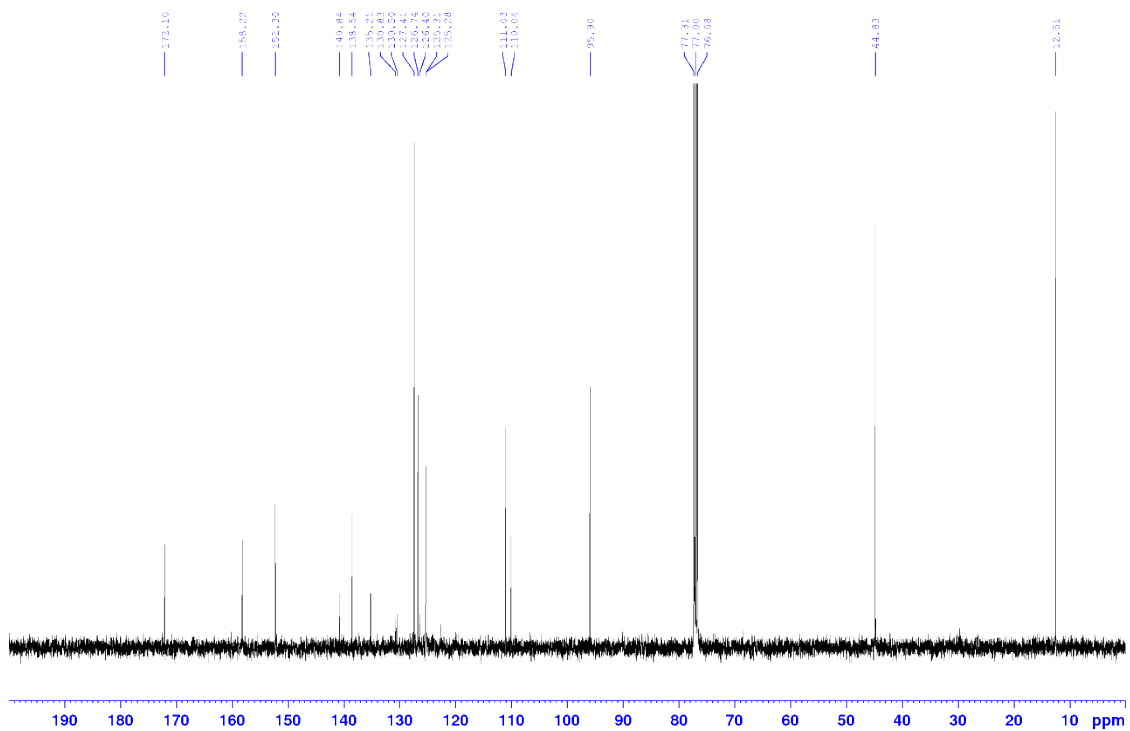

Figure S6.  $^{13}\text{C}$  NMR of F-NHF in  $\text{CDCl}_3$ .

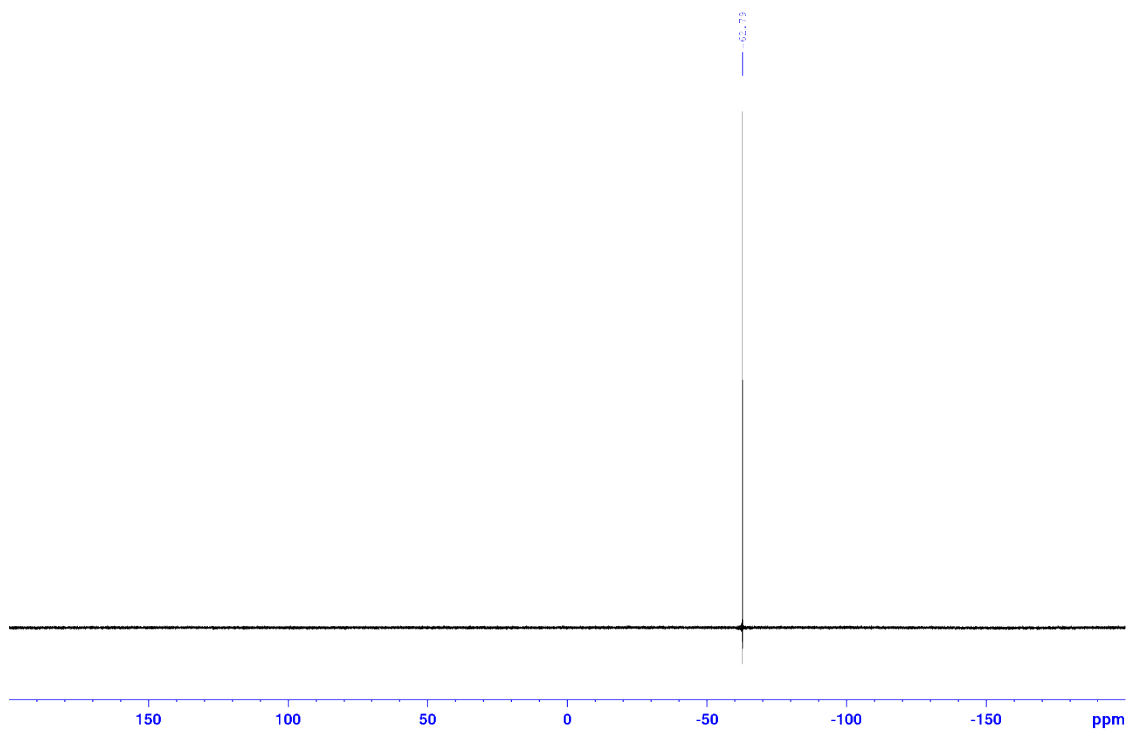

Figure S7.  $^{19}\text{F}$  NMR of F-NHF in  $\text{CDCl}_3$ .

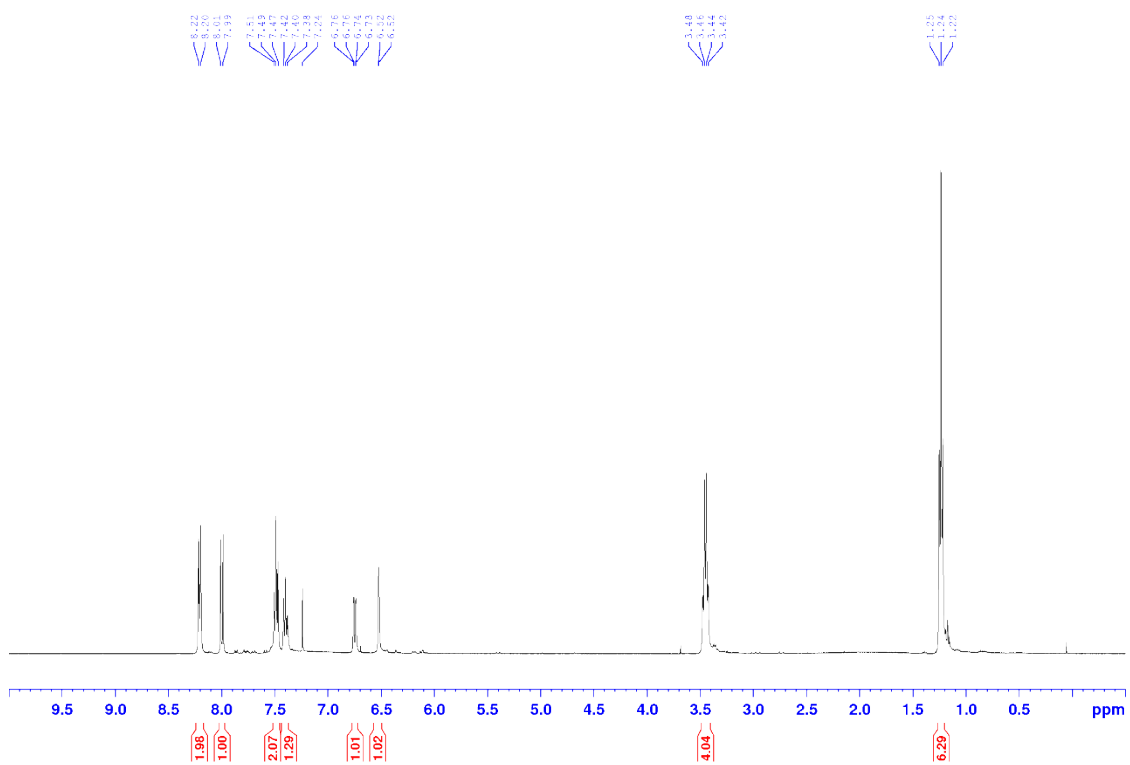

Figure S8.  $^1\text{H}$  NMR of H-NHF in  $\text{CDCl}_3$ .

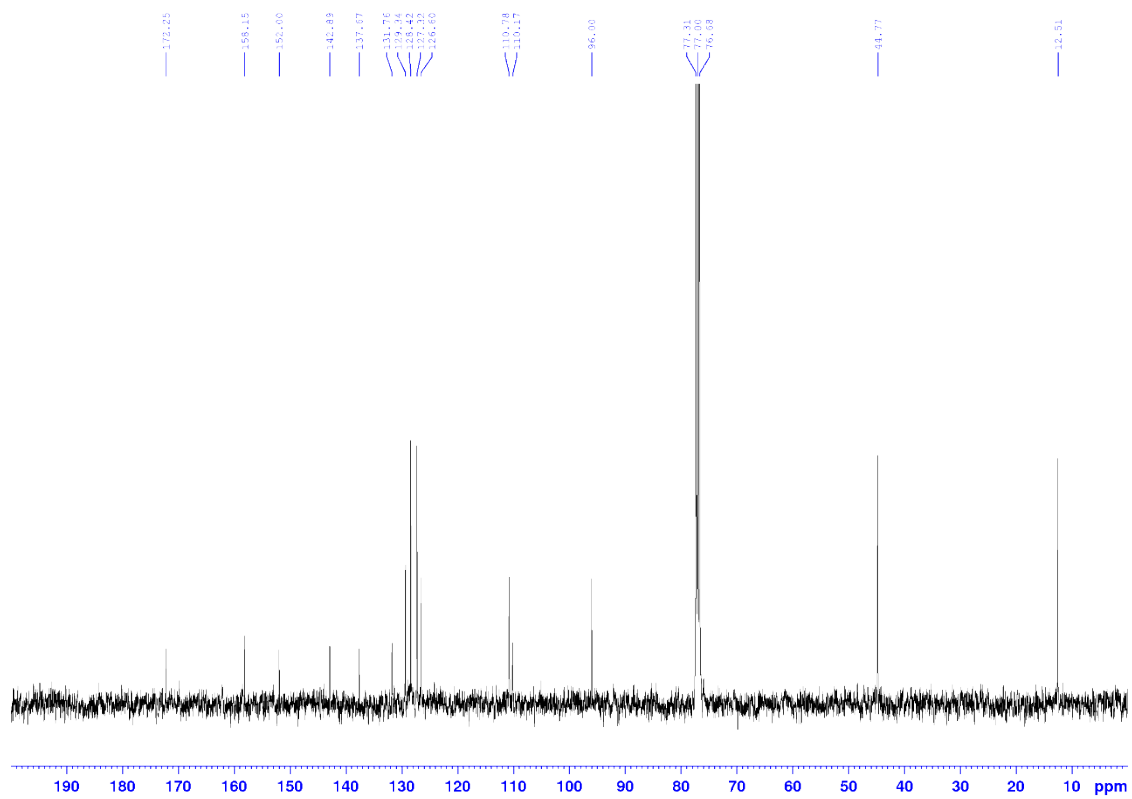

Figure S9.  $^{13}\text{C}$  NMR of H-NHF in  $\text{CDCl}_3$ .

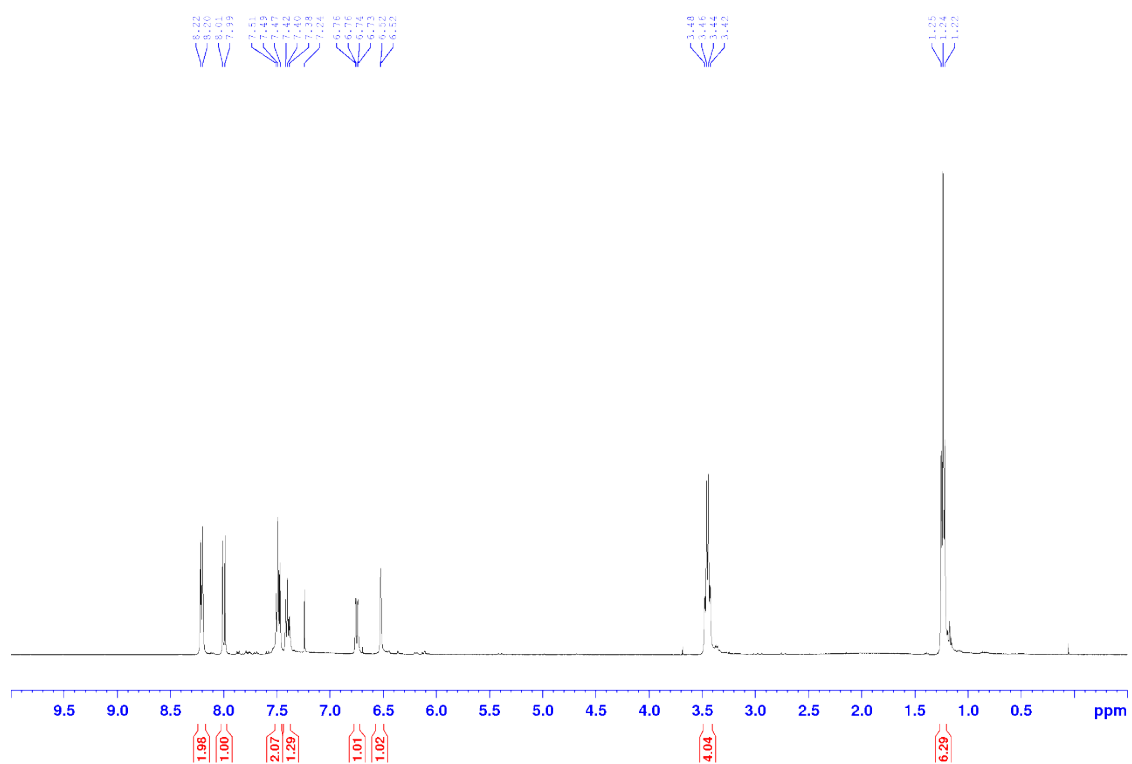

Figure S10.  $^1\text{H}$  NMR of O-NHF in  $\text{CDCl}_3$ .

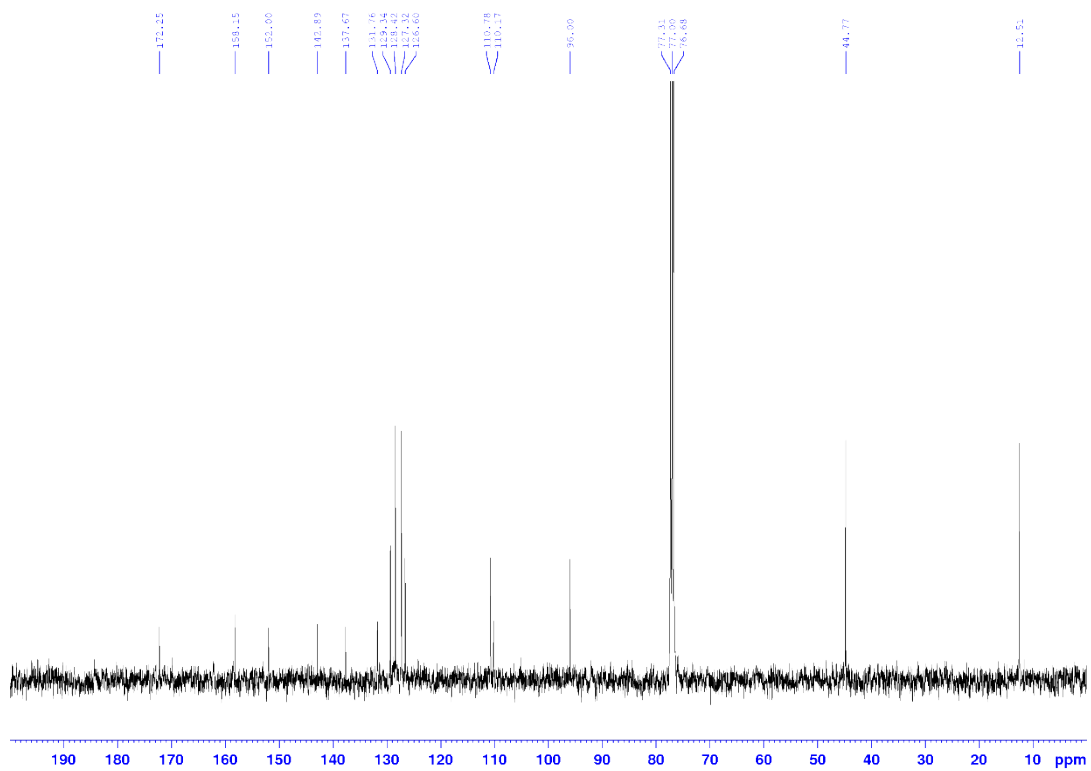

Figure S11.  $^{13}\text{C}$  NMR of O-NHF in  $\text{CDCl}_3$ .

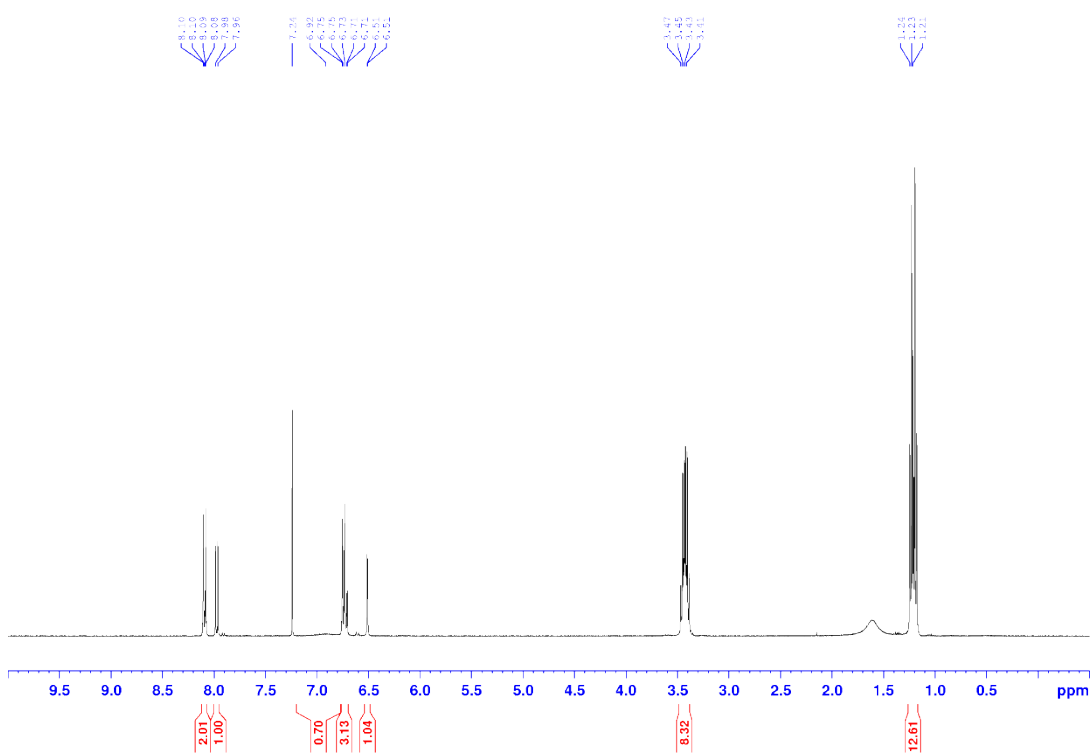

Figure S12.  $^1\text{H}$  NMR of N-NHF in  $\text{CDCl}_3$ .

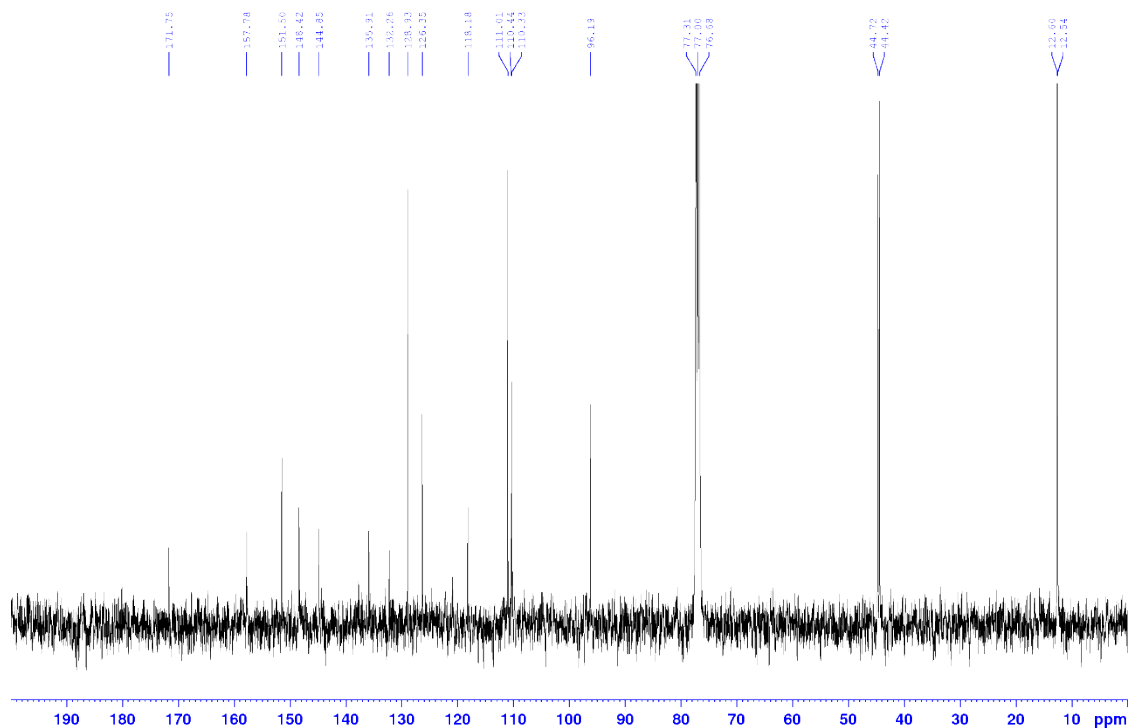

**Figure S13.**  $^{13}\text{C}$  NMR of N-NHF in  $\text{CDCl}_3$ .

**3. Spectroscopical measurement.** Steady-state absorption and emission spectra were recorded by a double-beam spectrophotometer (Hitachi U-3310) and a fluorescence spectrometer (Edinburgh FS980), respectively. The nanosecond time-resolved studies were performed by a time-correlated single photon counting (TCSPC) technique (Edinburgh FLS980) with a picosecond pulsed diode laser as the excitation light source. Both excitation and emission wavelengths of FLS 980 were carefully calibrated. The samples were prepared in a 1-cm length cuvette with an absorbance of 0.3 (approximately  $2 \times 10^{-5}$  M) at the excitation wavelength.

The picosecond time-resolved studies were performed using a time-correlated single photon counting (TCSPC) technique, where a  $\sim 120$  fs laser (400 nm) was employed as the pumping source. Incorporating this with a microchannel detector yielded a time resolution of approximately 20 ps. As for the fluorescence up-conversion measurement, a stable 120-fs LASER oscillator performed this ultrafast fluorescence up-conversion measurement (FOG100-DX, CDP corp.). A PUMP beam of 400 nm was generated by the part of the oscillator output traveling through the second harmonic generation (SHG,  $\beta$ -barium borate crystal). An iris selected the energy and the beam size of the PUMP after this SHG. The lens system was used to focus PUMP on the sample, to collect the fluorescence, and to focus the fluorescence on the sum-frequency BBO crystal (SHG,  $\beta$ -barium borate crystal), respectively. The entitled compounds are measured in a rotated cell with a transmitted collection mode. The GATE beam (800 nm) enters the delay line stage and crosses the fluorescence beam in the sum-frequency BBO with a collinear measurement. The polarized angle between PUMP and GATE is set at the magic angle ( $54.7^\circ$ ). A monochromator was applied and coupled with a PMT to record the sum-frequency signal. In this research, the FWHM of IRF is  $\sim 150$  fs.

**Table S1.** The computed optical excitations and molecular orbital contributions for (a) **NTFs** and (b) **NHFs**, (c) **3TFs**, and (d) **3HF**s.

(a)

| Compound | Structure            | State          | E<br>(eV) | Wavelength<br>(nm) | f       | Contribution | weight |
|----------|----------------------|----------------|-----------|--------------------|---------|--------------|--------|
| H-NTF    | Normal               | S <sub>1</sub> | 3.20      | 387.3              | 0.2805  | HOMO→LUMO    | 98%    |
|          | @S <sub>0</sub> -opt | S <sub>2</sub> | 3.65      | 339.8              | 0.1462  | HOMO-1→LUMO  | 95%    |
|          | Normal               | S <sub>1</sub> | 2.62      | 473.4              | 0.2612  | HOMO→LUMO    | 99%    |
|          | @S <sub>1</sub> -opt | S <sub>2</sub> | 3.13      | 396.0              | 0.1714  | HOMO-1→LUMO  | 98%    |
|          | Tautomer             | S <sub>1</sub> | 2.11      | 586.4              | 0.1768  | HOMO→LUMO    | 99%    |
|          | @S <sub>0</sub> -opt | S <sub>2</sub> | 2.48      | 499.6              | 0.0012  | HOMO-1→LUMO  | 99%    |
|          | Tautomer             | S <sub>1</sub> | 1.57      | 787.3              | 0.0879  | HOMO→LUMO    | 93%    |
|          | @S <sub>1</sub> -opt | S <sub>2</sub> | 1.81      | 683.5              | 0.0151  | HOMO-1→LUMO  | 93%    |
| F-NTF    | Normal               | S <sub>1</sub> | 3.04      | 408.0              | 0.2527  | HOMO→LUMO    | 98%    |
|          | @S <sub>0</sub> -opt | S <sub>2</sub> | 3.48      | 356.0              | 0.1401  | HOMO-1→LUMO  | 96%    |
|          | Normal               | S <sub>1</sub> | 2.44      | 508.1              | 0.2192  | HOMO→LUMO    | 99%    |
|          | @S <sub>1</sub> -opt | S <sub>2</sub> | 3.00      | 413.9              | 0.1942  | HOMO-1→LUMO  | 98%    |
|          | Tautomer             | S <sub>1</sub> | 2.08      | 595.6              | 0.1938  | HOMO→LUMO    | 99%    |
|          | @S <sub>0</sub> -opt | S <sub>2</sub> | 2.43      | 509.2              | 0.0015  | HOMO-1→LUMO  | 99%    |
|          | Tautomer             | S <sub>1</sub> | 1.53      | 810.9              | 0.0911  | HOMO→LUMO    | 92%    |
|          | @S <sub>1</sub> -opt | S <sub>2</sub> | 1.76      | 703.0              | 0.0158  | HOMO-1→LUMO  | 92%    |
| O-NTF    | Normal               | S <sub>1</sub> | 3.26      | 380.7              | 0.3941  | HOMO→LUMO    | 99%    |
|          | @S <sub>0</sub> -opt | S <sub>2</sub> | 3.72      | 333.7              | 0.1578  | HOMO-1→LUMO  | 94%    |
|          | Normal               | S <sub>1</sub> | 2.72      | 456.2              | 0.4323  | HOMO→LUMO    | 99%    |
|          | @S <sub>1</sub> -opt | S <sub>2</sub> | 3.29      | 376.3              | 0.1593  | HOMO-1→LUMO  | 97%    |
|          | Tautomer             | S <sub>1</sub> | 2.12      | 584.0              | 0.2332  | HOMO→LUMO    | 99%    |
|          | @S <sub>0</sub> -opt | S <sub>2</sub> | 2.52      | 491.5              | 0.0008  | HOMO-1→LUMO  | 99%    |
|          | Tautomer             | S <sub>1</sub> | 1.66      | 747.6              | 0.1308  | HOMO→LUMO    | 96%    |
|          | @S <sub>1</sub> -opt | S <sub>2</sub> | 1.91      | 647.9              | 0.0083  | HOMO-1→LUMO  | 96%    |
| N-NTF    | Normal               | S <sub>1</sub> | 3.07      | 403.4              | 0.7029  | HOMO→LUMO    | 98%    |
|          | @S <sub>0</sub> -opt | S <sub>2</sub> | 3.68      | 337.0              | 0.0984  | HOMO-1→LUMO  | 95%    |
|          | Normal               | S <sub>1</sub> | 2.71      | 457.8              | 0.7836  | HOMO→LUMO    | 98%    |
|          | @S <sub>1</sub> -opt | S <sub>2</sub> | 3.44      | 359.0              | 0.12171 | HOMO-1→LUMO  | 94%    |
|          | Tautomer             | S <sub>1</sub> | 2.11      | 588.6              | 0.41    | HOMO→LUMO    | 98%    |
|          | @S <sub>0</sub> -opt | S <sub>2</sub> | 2.56      | 484.1              | 0.0008  | HOMO-1→LUMO  | 99%    |
|          | Tautomer             | S <sub>1</sub> | 1.72      | 722.2              | 0.2396  | HOMO→LUMO    | 97%    |
|          | @S <sub>1</sub> -opt | S <sub>2</sub> | 2.03      | 609.7              | 0.0082  | HOMO-1→LUMO  | 98%    |

(b)

| Compound | Structure            | State          | E (eV) | Wavelength (nm) | f      | Contribution | weight |
|----------|----------------------|----------------|--------|-----------------|--------|--------------|--------|
| H-NHF    | Normal               | S <sub>1</sub> | 3.17   | 391.4           | 0.4986 | HOMO→LUMO    | 99%    |
|          | @S <sub>0</sub> -opt | S <sub>2</sub> | 3.79   | 327.2           | 0.194  | HOMO-1→LUMO  | 91%    |
|          | Normal               | S <sub>1</sub> | 2.80   | 443.2           | 0.4305 | HOMO→LUMO    | 99%    |
|          | @S <sub>1</sub> -opt | S <sub>2</sub> | 3.52   | 352.7           | 0.27   | HOMO-1→LUMO  | 95%    |
|          | Tautomer             | S <sub>1</sub> | 2.43   | 511.2           | 0.5525 | HOMO→LUMO    | 100%   |
|          | @S <sub>0</sub> -opt | S <sub>2</sub> | 3.52   | 352.0           | 0.0004 | HOMO-2→LUMO  | 99%    |
|          | Tautomer             | S <sub>1</sub> | 2.16   | 574.2           | 0.5311 | HOMO→LUMO    | 101%   |
|          | @S <sub>1</sub> -opt | S <sub>2</sub> | 3.14   | 395.0           | 0.0000 | HOMO-2→LUMO  | 99%    |
| F-NHF    | Normal               | S <sub>1</sub> | 3.04   | 407.8           | 0.4513 | HOMO→LUMO    | 99%    |
|          | @S <sub>0</sub> -opt | S <sub>2</sub> | 3.68   | 336.6           | 0.1997 | HOMO-1→LUMO  | 92%    |
|          | Normal               | S <sub>1</sub> | 2.60   | 476.2           | 0.3508 | HOMO→LUMO    | 99%    |
|          | @S <sub>1</sub> -opt | S <sub>2</sub> | 3.39   | 366.2           | 0.2528 | HOMO-1→LUMO  | 95%    |
|          | Tautomer             | S <sub>1</sub> | 2.37   | 522.3           | 0.5724 | HOMO→LUMO    | 100%   |
|          | @S <sub>0</sub> -opt | S <sub>2</sub> | 3.50   | 354.2           | 0.0011 | HOMO-2→LUMO  | 98%    |
|          | Tautomer             | S <sub>1</sub> | 2.10   | 589.1           | 0.5439 | HOMO→LUMO    | 101%   |
|          | @S <sub>1</sub> -opt | S <sub>2</sub> | 3.10   | 399.6           | 0      | HOMO-2→LUMO  | 99%    |
| O-NHF    | Normal               | S <sub>1</sub> | 3.18   | 390.5           | 0.6582 | HOMO→LUMO    | 99%    |
|          | @S <sub>0</sub> -opt | S <sub>2</sub> | 3.78   | 328.0           | 0.2216 | HOMO-1→LUMO  | 93%    |
|          | Normal               | S <sub>1</sub> | 2.89   | 429.0           | 0.6999 | HOMO→LUMO    | 98%    |
|          | @S <sub>1</sub> -opt | S <sub>2</sub> | 3.55   | 349.4           | 0.2503 | HOMO-1→LUMO  | 93%    |
|          | Tautomer             | S <sub>1</sub> | 2.39   | 519.0           | 0.6448 | HOMO→LUMO    | 100%   |
|          | @S <sub>0</sub> -opt | S <sub>2</sub> | 3.56   | 348.5           | 0.0006 | HOMO-3→LUMO  | 98%    |
|          | Tautomer             | S <sub>1</sub> | 2.15   | 577.4           | 0.6264 | HOMO→LUMO    | 101%   |
|          | @S <sub>1</sub> -opt | S <sub>2</sub> | 3.21   | 386.3           | 0.0001 | HOMO-2→LUMO  | 98%    |
| N-NHF    | Normal               | S <sub>1</sub> | 2.99   | 415.1           | 0.9709 | HOMO→LUMO    | 98%    |
|          | @S <sub>0</sub> -opt | S <sub>2</sub> | 3.69   | 336.2           | 0.1179 | HOMO-1→LUMO  | 95%    |
|          | Normal               | S <sub>1</sub> | 2.77   | 448.1           | 1.0253 | HOMO→LUMO    | 98%    |
|          | @S <sub>1</sub> -opt | S <sub>2</sub> | 3.58   | 346.4           | 0.1132 | HOMO-1→LUMO  | 94%    |
|          | Tautomer             | S <sub>1</sub> | 2.28   | 544.1           | 0.8837 | HOMO→LUMO    | 98%    |
|          | @S <sub>0</sub> -opt | S <sub>2</sub> | 3.35   | 370.2           | 0.0888 | HOMO-1→LUMO  | 99%    |
|          | Tautomer             | S <sub>1</sub> | 2.10   | 591.0           | 0.8629 | HOMO→LUMO    | 97%    |
|          | @S <sub>1</sub> -opt | S <sub>2</sub> | 3.26   | 380.3           | 0.1309 | HOMO-1→LUMO  | 98%    |

(c)

| Compound                         | Structure                        | State          | E (eV) | Wavelength (nm) | f           | Contribution | weight |
|----------------------------------|----------------------------------|----------------|--------|-----------------|-------------|--------------|--------|
| H-3TF                            | Normal<br>@S <sub>0</sub> -opt   | S <sub>1</sub> | 3.34   | 371.4           | 0.2099      | HOMO→LUMO    | 98%    |
|                                  |                                  | S <sub>2</sub> | 3.94   | 315.0           | 0.0067      | HOMO-3→LUMO  | 24%    |
|                                  |                                  |                |        |                 |             | HOMO-2→LUMO  | 55%    |
|                                  |                                  |                |        |                 |             | HOMO-1→LUMO  | 10%    |
|                                  | Normal<br>@S <sub>1</sub> -opt   | S <sub>1</sub> | 2.76   | 450.0           | 0.2652      | HOMO→LUMO    | 99%    |
|                                  |                                  | S <sub>2</sub> | 3.73   | 332.6           | 0.0195      | HOMO-3→LUMO  | 13%    |
|                                  |                                  |                |        |                 |             | HOMO-2→LUMO  | 60%    |
|                                  |                                  |                |        |                 |             | HOMO-1→LUMO  | 15%    |
|                                  | Tautomer<br>@S <sub>0</sub> -opt | S <sub>1</sub> | 2.03   | 611.0           | 0.1273      | HOMO→LUMO    | 99%    |
|                                  |                                  | S <sub>2</sub> | 2.30   | 538.3           | 0.0013      | HOMO-1→LUMO  | 99%    |
|                                  |                                  | S <sub>1</sub> | 1.41   | 877.8           | 0.0449      | HOMO-1→LUMO  | 16%    |
|                                  |                                  |                |        |                 |             | HOMO→LUMO    | 84%    |
| Tautomer<br>@S <sub>1</sub> -opt | S <sub>2</sub>                   | 1.62           | 763.4  | 0.0256          | HOMO-1→LUMO | 84%          |        |
|                                  |                                  |                |        |                 | HOMO→LUMO   | 16%          |        |
|                                  |                                  |                |        |                 |             |              |        |
|                                  |                                  |                |        |                 |             |              |        |
| F-3TF                            | Normal<br>@S <sub>0</sub> -opt   | S <sub>1</sub> | 3.26   | 380.7           | 0.2076      | HOMO→LUMO    | 98%    |
|                                  |                                  | S <sub>2</sub> | 3.89   | 318.5           | 0.0068      | HOMO-2→LUMO  | 85%    |
|                                  | Normal<br>@S <sub>1</sub> -opt   | S <sub>1</sub> | 2.65   | 468.4           | 0.2483      | HOMO→LUMO    | 99%    |
|                                  |                                  | S <sub>2</sub> | 3.63   | 341.6           | 0.0187      | HOMO-2→LUMO  | 81%    |
|                                  | Tautomer<br>@S <sub>0</sub> -opt | S <sub>1</sub> | 1.99   | 623.0           | 0.1308      | HOMO→LUMO    | 99%    |
|                                  |                                  | S <sub>2</sub> | 2.26   | 549.0           | 0.0016      | HOMO-1→LUMO  | 99%    |
|                                  | Tautomer<br>@S <sub>1</sub> -opt | S <sub>1</sub> | 1.34   | 927.0           | 0.0412      | HOMO-1→LUMO  | 18%    |
|                                  |                                  |                |        |                 |             | HOMO→LUMO    | 82%    |
|                                  |                                  | S <sub>2</sub> | 1.55   | 799.9           | 0.0285      | HOMO-1→LUMO  | 82%    |
|                                  |                                  |                |        |                 |             | HOMO→LUMO    | 18%    |
| O-3TF                            | Normal<br>@S <sub>0</sub> -opt   | S <sub>1</sub> | 3.29   | 376.3           | 0.3379      | HOMO→LUMO    | 98%    |
|                                  |                                  | S <sub>2</sub> | 3.92   | 316.2           | 0.0525      | HOMO-3→LUMO  | 32%    |
|                                  |                                  |                |        |                 |             | HOMO-2→LUMO  | 19%    |
|                                  |                                  |                |        |                 |             | HOMO-1→LUMO  | 42%    |
|                                  | Normal<br>@S <sub>1</sub> -opt   | S <sub>1</sub> | 2.81   | 440.5           | 0.4097      | HOMO→LUMO    | 99%    |
|                                  |                                  | S <sub>2</sub> | 3.76   | 330.0           | 0.1093      | HOMO-2→LUMO  | 37%    |
|                                  | Tautomer<br>@S <sub>1</sub> -opt |                |        |                 |             | HOMO-1→LUMO  | 48%    |
|                                  |                                  | S <sub>1</sub> | 2.09   | 591.9           | 0.2005      | HOMO→LUMO    | 99%    |
|                                  |                                  | S <sub>2</sub> | 2.36   | 525.3           | 0           | HOMO-1→LUMO  | 99%    |
|                                  |                                  | S <sub>1</sub> | 1.53   | 811.5           | 0.075       | HOMO-1→LUMO  | 11%    |
| Tautomer<br>@S <sub>1</sub> -opt |                                  |                |        |                 | HOMO→LUMO   | 88%          |        |
|                                  | S <sub>2</sub>                   | 1.73           | 718.6  | 0.0215          | HOMO-1→LUMO | 88%          |        |
|                                  |                                  |                |        |                 | HOMO→LUMO   | 11%          |        |
| N-3TF                            | Normal                           | S <sub>1</sub> | 2.99   | 415.0           | 0.6201      | HOMO→LUMO    | 99%    |
|                                  | @S <sub>0</sub> -opt             | S <sub>2</sub> | 3.69   | 336.3           | 0.0344      | HOMO-1→LUMO  | 96%    |

---

|                      |                |      |       |        |             |     |
|----------------------|----------------|------|-------|--------|-------------|-----|
| Normal               | S <sub>1</sub> | 2.63 | 471.5 | 0.6251 | HOMO→LUMO   | 99% |
| @S <sub>1</sub> -opt | S <sub>2</sub> | 3.44 | 360.1 | 0.0443 | HOMO-1→LUMO | 97% |
| Tautomer             | S <sub>1</sub> | 2.07 | 599.8 | 0.3379 | HOMO→LUMO   | 97% |
| @S <sub>0</sub> -opt | S <sub>2</sub> | 2.40 | 516.2 | 0.0009 | HOMO-1→LUMO | 99% |
| Tautomer             | S <sub>1</sub> | 1.65 | 751.6 | 0.1568 | HOMO→LUMO   | 92% |
| @S <sub>1</sub> -opt | S <sub>2</sub> | 1.87 | 661.5 | 0.0186 | HOMO-1→LUMO | 94% |

---

---

(d)

| Compound | Structure                        | State                            | E (eV)         | Wavelength (nm) | f      | Contribution | weight      |      |
|----------|----------------------------------|----------------------------------|----------------|-----------------|--------|--------------|-------------|------|
| H-3HF    | Normal<br>@S <sub>0</sub> -opt   | S <sub>1</sub>                   | 3.48           | 356.5           | 0.5051 | HOMO→LUMO    | 98%         |      |
|          |                                  | S <sub>2</sub>                   | 4.06           | 305.7           | 0.0028 | HOMO-4→LUMO  | 13%         |      |
|          | Normal<br>@S <sub>1</sub> -opt   | S <sub>1</sub>                   | 3.04           | 407.3           | 0.5656 | HOMO→LUMO    | 99%         |      |
|          |                                  | S <sub>2</sub>                   | 4.01           | 309.0           | 0.1413 | HOMO-1→LUMO  | 91%         |      |
|          | Tautomer<br>@S <sub>0</sub> -opt | S <sub>1</sub>                   | 2.52           | 492.2           | 0.4712 | HOMO→LUMO    | 101%        |      |
|          |                                  | S <sub>2</sub>                   | 3.35           | 370.6           | 0      | HOMO-1→LUMO  | 99%         |      |
|          |                                  | Tautomer<br>@S <sub>1</sub> -opt | S <sub>1</sub> | 2.26            | 549.1  | 0.4504       | HOMO→LUMO   | 101% |
|          |                                  |                                  | S <sub>2</sub> | 2.96            | 418.2  | 0            | HOMO-1→LUMO | 99%  |
| F-3HF    | Normal<br>@S <sub>0</sub> -opt   | S <sub>1</sub>                   | 3.46           | 358.7           | 0.4921 | HOMO→LUMO    | 98%         |      |
|          |                                  | S <sub>2</sub>                   | 4.00           | 310.4           | 0.0005 | HOMO-4→LUMO  | 95%         |      |
|          | Normal<br>@S <sub>1</sub> -opt   | S <sub>1</sub>                   | 3.03           | 408.9           | 0.575  | HOMO→LUMO    | 99%         |      |
|          |                                  | S <sub>2</sub>                   | 3.94           | 314.9           | 0      | HOMO-4→LUMO  | 96%         |      |
|          | Tautomer<br>@S <sub>0</sub> -opt | S <sub>1</sub>                   | 2.50           | 496.2           | 0.4795 | HOMO→LUMO    | 101%        |      |
|          |                                  | S <sub>2</sub>                   | 3.31           | 374.4           | 0      | HOMO-1→LUMO  | 99%         |      |
|          |                                  | Tautomer<br>@S <sub>1</sub> -opt | S <sub>1</sub> | 2.22            | 558.5  | 0.4541       | HOMO→LUMO   | 101% |
|          |                                  |                                  | S <sub>2</sub> | 2.90            | 427.3  | 0            | HOMO-1→LUMO | 99%  |
| O-3HF    | Normal<br>@S <sub>0</sub> -opt   | S <sub>1</sub>                   | 3.32           | 373.7           | 0.6874 | HOMO→LUMO    | 99%         |      |
|          |                                  | S <sub>2</sub>                   | 4.05           | 306.1           | 0.1271 | HOMO-1→LUMO  | 93%         |      |
|          | Normal<br>@S <sub>1</sub> -opt   | S <sub>1</sub>                   | 2.95           | 420.6           | 0.7005 | HOMO→LUMO    | 99%         |      |
|          |                                  | S <sub>2</sub>                   | 3.93           | 315.3           | 0.0976 | HOMO-1→LUMO  | 92%         |      |
|          | Tautomer<br>@S <sub>0</sub> -opt | S <sub>1</sub>                   | 2.46           | 503.3           | 0.5965 | HOMO→LUMO    | 101%        |      |
|          |                                  | S <sub>2</sub>                   | 3.39           | 366.2           | 0      | HOMO-2→LUMO  | 99%         |      |
|          |                                  | Tautomer<br>@S <sub>1</sub> -opt | S <sub>1</sub> | 2.25            | 552.0  | 0.5773       | HOMO→LUMO   | 101% |
|          |                                  |                                  | S <sub>2</sub> | 3.07            | 403.4  | 0            | HOMO-2→LUMO | 99%  |
| N-3HF    | Normal<br>@S <sub>0</sub> -opt   | S <sub>1</sub>                   | 2.92           | 424.0           | 0.8462 | HOMO→LUMO    | 99%         |      |
|          |                                  | S <sub>2</sub>                   | 3.92           | 316.4           | 0.0367 | HOMO-1→LUMO  | 88%         |      |
|          | Normal<br>@S <sub>1</sub> -opt   | S <sub>1</sub>                   | 2.68           | 462.6           | 0.7782 | HOMO→LUMO    | 99%         |      |
|          |                                  | S <sub>2</sub>                   | 3.7799         | 328.0           | 0.0202 | HOMO-1→LUMO  | 94%         |      |
|          | Tautomer<br>@S <sub>0</sub> -opt | S <sub>1</sub>                   | 2.33           | 531.3           | 0.8704 | HOMO→LUMO    | 101%        |      |
|          |                                  | S <sub>2</sub>                   | 3.29           | 376.5           | 0.1113 | HOMO-1→LUMO  | 97%         |      |
|          |                                  | Tautomer<br>@S <sub>1</sub> -opt | S <sub>1</sub> | 2.19            | 566.4  | 0.8527       | HOMO→LUMO   | 101% |
|          |                                  |                                  | S <sub>2</sub> | 3.21            | 386.4  | 0.1429       | HOMO-1→LUMO | 92%  |

**Table S2.** The energy difference between the S1(N) and S1(T) states ( $\Delta E_R^{ES}$ ) and energy differences between substituted and unsubstituted systems ( $\Delta(\Delta E_R^{ES})$ ) in (a) **NTFs** and **NHFs**, (b) **3TFs** and **3HFs**.

(a)

| compound                       | F-NTF  | H-NTF | O-NTF | N-NTF | F-NHF | H-NHF | O-NHF | N-NHF |
|--------------------------------|--------|-------|-------|-------|-------|-------|-------|-------|
| $\Delta E_R^{ES}$ (eV)         | 0.781  | 0.785 | 0.932 | 1.770 | 0.184 | 0.154 | 0.330 | 0.246 |
| $\Delta(\Delta E_R^{ES})$ (eV) | -0.004 | 0.000 | 0.147 | 0.985 | 0.030 | 0.000 | 0.176 | 0.092 |

(b)

| compound                       | F-3TF  | H-3TF | O-3TF  | N-3TF  | F-3HF | H-3HF | O-3HF  | N-3HF  |
|--------------------------------|--------|-------|--------|--------|-------|-------|--------|--------|
| $\Delta E_R^{ES}$ (eV)         | 1.026  | 1.050 | 1.015  | 0.782  | 0.421 | 0.394 | 0.309  | 0.110  |
| $\Delta(\Delta E_R^{ES})$ (eV) | -0.024 | 0.000 | -0.035 | -0.268 | 0.027 | 0.000 | -0.085 | -0.284 |

**Table S3.** Calculated vibrational frequencies and bond lengths of C=O and X-H (X = S or O) in  $S_0$  and  $S_1$ -optimized normal form structures of **NTFs** and **NHFs**, along with experimental C=O bond lengths obtained from single-crystal XRD and proton transfer rates.

| Bond\Structure                     | F-NTF   | H-NTF   | O-NTF   | N-NTF   | F-NHF   | H-NHF   | O-NHF   | N-NHF   |
|------------------------------------|---------|---------|---------|---------|---------|---------|---------|---------|
| vibrational frequency @ $S_0$ -opt | 2581.49 | 2585.62 | 2587.08 | 2585.45 | 3518.05 | 3525.75 | 3536.06 | 3543.08 |
| vibrational frequency @ $S_1$ -opt | 2568.81 | 2504.17 | 2315.83 | 2339.73 | 3555.85 | 3484.82 | 3348.89 | 3253.57 |
| S-H @ $S_0$ -opt (Å)               | 1.352   | 1.352   | 1.351   | 1.351   | 0.980   | 0.980   | 0.979   | 0.978   |
| S-H @ $S_1$ -opt (Å)               | 1.353   | 1.359   | 1.379   | 1.376   | 0.978   | 0.982   | 0.990   | 0.996   |
| $\Delta$ (S-H) <sup>o</sup> (Å)    | 0.001   | 0.008   | 0.028   | 0.025   | -0.003  | 0.002   | 0.011   | 0.017   |
| C=O @ $S_0$ -opt (Å)               | 1.233   | 1.234   | 1.234   | 1.236   | 1.241   | 1.242   | 1.243   | 1.244   |
| C=O @ $S_1$ -opt (Å)               | 1.248   | 1.256   | 1.264   | 1.270   | 1.257   | 1.265   | 1.270   | 1.272   |
| $\Delta$ (C=O) <sup>o</sup> (Å)    | 0.015   | 0.022   | 0.030   | 0.034   | 0.016   | 0.023   | 0.027   | 0.028   |
| C=O @Exp (Å)                       | 1.237   | 1.240   | 1.238   | 1.244   | --      | --      | --      | --      |
| k <sub>PT</sub> (fs)               | 398     | 232     | 123     | 101     |         |         |         |         |

**Table S4.** Calculated vibrational frequencies and bond lengths of C=O and X-H (X = S or O) in S<sub>0</sub> and S<sub>1</sub>-optimized normal form structures of **3TFs** and **3HF**s..

| Bond\Structure                                | F-3TF   | H-3TF   | O-3TF    | N-3TF   | F-3HF     | H-3HF   | O-3HF   | N-3HF   |
|-----------------------------------------------|---------|---------|----------|---------|-----------|---------|---------|---------|
| vibrational frequency<br>@S <sub>0</sub> -opt | 2600.12 | 2604.02 | 2600.78  | 2597.09 | 3550.59   | 3560.05 | 3556.97 | 3561.23 |
| vibrational frequency<br>@S <sub>1</sub> -opt | 2370.33 | 2338.86 | 2560.12  | 2085.94 | 3229.2313 | 3176.17 | 3185.23 | 3275.61 |
| S-H @S <sub>0</sub> -opt (Å)                  | 1.35025 | 1.34991 | 1.35017  | 1.35045 | 0.97836   | 0.97771 | 0.97779 | 0.97749 |
| S-H @S <sub>1</sub> -opt (Å)                  | 1.37592 | 1.37592 | 1.3454   | 1.40824 | 0.99849   | 1.00159 | 1.00053 | 0.99436 |
| D (S-H) <sub>a</sub> (Å)                      | 0.02567 | 0.02601 | -0.00477 | 0.05779 | 0.02013   | 0.02388 | 0.02274 | 0.01687 |
| C=O @S <sub>0</sub> -opt (Å)                  | 1.22853 | 1.22965 | 1.23087  | 1.23295 | 1.23562   | 1.23723 | 1.23893 | 1.24136 |
| C=O @S <sub>1</sub> -opt (Å)                  | 1.2495  | 1.25688 | 1.25699  | 1.2645  | 1.25575   | 1.25816 | 1.26023 | 1.26222 |
| D (C=O) <sub>a</sub> (Å)                      | 0.02097 | 0.02723 | 0.02612  | 0.03155 | 0.02013   | 0.02093 | 0.0213  | 0.02086 |

**Table S5.** Charges on the donor (S or O) and acceptor (O) atoms, and the corresponding charge differences ( $\Delta q$ ) between them in the  $S_1$  state, obtained from  $S_1(N)$ -optimized geometries. (a) **NTFs** and **NHFs**; (b) **3TFs** and **3HFs**.

(a)

| compound              | F-NTF | H-NTF | O-NTF | N-NTF | F-NHF | H-NHF | O-NHF | N-NHF |
|-----------------------|-------|-------|-------|-------|-------|-------|-------|-------|
| $q_{\text{donor}}$    | 0.04  | 0.08  | 0.15  | 0.11  | -0.69 | -0.68 | -0.66 | -0.67 |
| $q_{\text{acceptor}}$ | -0.68 | -0.71 | -0.72 | -0.73 | -0.71 | -0.74 | -0.75 | -0.77 |
| $\Delta q$            | 0.72  | 0.79  | 0.87  | 0.84  | 0.02  | 0.06  | 0.09  | 0.1   |

(b)

| compound              | F-3TF | H-3TF | O-3TF | N-3TF | F-3HF | H-3HF | O-3HF | N-3HF |
|-----------------------|-------|-------|-------|-------|-------|-------|-------|-------|
| $q_{\text{donor}}$    | 0.35  | 0.35  | 0.31  | 0.12  | -0.59 | -0.60 | -0.62 | -0.67 |
| $q_{\text{acceptor}}$ | -0.67 | -0.68 | -0.70 | -0.70 | -0.68 | -0.69 | -0.70 | -0.72 |
| $\Delta q$            | 1.02  | 1.03  | 1.01  | 0.82  | 0.09  | 0.09  | 0.08  | 0.05  |

**Table S6.** The computed optical excitations and molecular orbital contributions with CAM-B3LYP functionals for (a) **NTFs** and (b) **NHFs**, (c) **3TFs**, and (d) **3HFs**.

(a)

| Compound | State | E (eV) | Wavelength (nm) | f      | Contribution              | weight |
|----------|-------|--------|-----------------|--------|---------------------------|--------|
| H-NTF    | $S_1$ | 2.84   | 436.8           | 0.3447 | HOMO $\rightarrow$ LUMO   | 92%    |
|          | $S_2$ | 3.75   | 330.4           | 0.3141 | HOMO-1 $\rightarrow$ LUMO | 87%    |
| F-NTF    | $S_1$ | 2.82   | 440.4           | 0.3514 | HOMO $\rightarrow$ LUMO   | 89%    |
|          | $S_2$ | 3.65   | 339.8           | 0.2983 | HOMO-1 $\rightarrow$ LUMO | 84%    |
| O-NTF    | $S_1$ | 2.80   | 442.9           | 0.4647 | HOMO $\rightarrow$ LUMO   | 95%    |
|          | $S_2$ | 3.85   | 322.2           | 0.3328 | HOMO-1 $\rightarrow$ LUMO | 87%    |
| N-NTF    | $S_1$ | 2.82   | 440.0           | 0.8097 | HOMO $\rightarrow$ LUMO   | 96%    |
|          | $S_2$ | 4.02   | 308.8           | 0.3523 | HOMO-2 $\rightarrow$ LUMO | 11%    |
|          |       |        |                 |        | HOMO-1 $\rightarrow$ LUMO | 77%    |

(b)

| Compound | State | E (eV) | Wavelength (nm) | f      | Contribution              | weight |
|----------|-------|--------|-----------------|--------|---------------------------|--------|
| H-NHF    | $S_1$ | 3.22   | 385.0           | 0.3447 | HOMO $\rightarrow$ LUMO   | 95%    |
|          | $S_2$ | 4.06   | 305.3           | 0.3078 | HOMO-1 $\rightarrow$ LUMO | 85%    |
| F-NHF    | $S_1$ | 3.1617 | 392.14          | 0.7133 | HOMO $\rightarrow$ LUMO   | 92%    |
|          | $S_2$ | 3.955  | 313.49          | 0.3142 | HOMO-1 $\rightarrow$ LUMO | 87%    |
| O-NHF    | $S_1$ | 3.1914 | 388.5           | 0.878  | HOMO $\rightarrow$ LUMO   | 96%    |
|          | $S_2$ | 4.1434 | 299.23          | 0.3234 | HOMO-1 $\rightarrow$ LUMO | 82%    |
| N-NHF    | $S_1$ | 3.0447 | 407.22          | 1.1825 | HOMO $\rightarrow$ LUMO   | 95%    |
|          | $S_2$ | 4.1975 | 295.38          | 0.3089 | HOMO-1 $\rightarrow$ LUMO | 76%    |

(c)

| Compound | State          | E (eV) | Wavelength (nm) | f      | Contribution | weight |
|----------|----------------|--------|-----------------|--------|--------------|--------|
| H-3TF    | S <sub>1</sub> | 2.81   | 440.6           | 0.3177 | HOMO→LUMO    | 97%    |
|          | S <sub>2</sub> | 4.07   | 304.3           | 0.0223 | HOMO-4→LUMO  | 31%    |
|          |                |        |                 |        | HOMO-2→LUMO  | 30%    |
| F-3TF    | S <sub>1</sub> | 2.80   | 440.4           | 0.3514 | HOMO→LUMO    | 98%    |
|          | S <sub>2</sub> | 4.04   | 306.9           | 0.0189 | HOMO-3→LUMO  | 44%    |
|          |                |        |                 |        | HOMO-2→LUMO  | 21%    |
| O-3TF    | S <sub>1</sub> | 2.77   | 447.4           | 0.4506 | HOMO→LUMO    | 97%    |
|          | S <sub>2</sub> | 4.05   | 305.9           | 0.0797 | HOMO-4→LUMO  | 23%    |
|          |                |        |                 |        | HOMO-2→LUMO  | 16%    |
|          |                |        |                 |        | HOMO-1→LUMO  | 28%    |
|          |                |        |                 |        | HOMO→LUMO+1  | 13%    |
| N-3TF    | S <sub>1</sub> | 2.85   | 434.6           | 0.8138 | HOMO→LUMO    | 95%    |
|          | S <sub>2</sub> | 4.04   | 307.0           | 0.2029 | HOMO-1→LUMO  | 76%    |

(d)

| Compound | State          | E (eV) | Wavelength (nm) | f      | Contribution | weight |
|----------|----------------|--------|-----------------|--------|--------------|--------|
| H-3HF    | S <sub>1</sub> | 3.30   | 375.2           | 0.6752 | HOMO→LUMO    | 98%    |
|          | S <sub>2</sub> | 4.39   | 282.1           | 0.1042 | HOMO-1→LUMO  | 71%    |
|          |                |        |                 |        | HOMO→LUMO+1  | 19%    |
| F-3HF    | S <sub>1</sub> | 3.28   | 377.8           | 0.6861 | HOMO→LUMO    | 98%    |
|          | S <sub>2</sub> | 4.37   | 283.7           | 0.1385 | HOMO-1→LUMO  | 72%    |
|          |                |        |                 |        | HOMO→LUMO+1  | 18%    |
| O-3HF    | S <sub>1</sub> | 3.24   | 383.1           | 0.8519 | HOMO→LUMO    | 97%    |
|          | S <sub>2</sub> | 4.35   | 284.7           | 0.1162 | HOMO-1→LUMO  | 69%    |
|          |                |        |                 |        | HOMO→LUMO+1  | 19%    |
| N-3HF    | S <sub>1</sub> | 3.05   | 406.8           | 1.1341 | HOMO→LUMO    | 94%    |
|          | S <sub>2</sub> | 4.27   | 290.6           | 0.0857 | HOMO-1→LUMO  | 65%    |
|          |                |        |                 |        | HOMO→LUMO+2  | 20%    |

**Table S7.** Charges on the donor (S or O) and acceptor (O) atoms, and the corresponding charge differences ( $\Delta q$ ) between them in the S<sub>1</sub> state, obtained from S<sub>1</sub>(N)-optimized geometries with CAM-B3LYP functionals. (a) **NTFs** and **NHFs**; (b) **3TFs** and **3HFs**.

(a)

| compound              | F-NTF | H-NTF | O-NTF | N-NTF | F-NHF | H-NHF | O-NHF | N-NHF |
|-----------------------|-------|-------|-------|-------|-------|-------|-------|-------|
| q <sub>donor</sub>    | 0.24  | 0.23  | 0.20  | 0.14  | -0.65 | -0.65 | -0.65 | -0.67 |
| q <sub>acceptor</sub> | -0.71 | -0.72 | -0.72 | -0.72 | -0.76 | -0.77 | -0.77 | -0.80 |
| $\Delta q$            | 0.95  | 0.95  | 0.92  | 0.86  | 0.11  | 0.12  | 0.12  | 0.12  |

(b)

| compound              | F-3TF | H-3TF | O-3TF | N-3TF | F-3HF | H-3HF | O-3HF | N-3HF |
|-----------------------|-------|-------|-------|-------|-------|-------|-------|-------|
| $q_{\text{donor}}$    | 0.33  | 0.30  | 0.26  | 0.17  | -0.60 | -0.61 | -0.63 | -0.66 |
| $q_{\text{acceptor}}$ | -0.67 | -0.68 | -0.69 | -0.71 | -0.70 | -0.71 | -0.73 | -0.75 |
| $\Delta q$            | 1.00  | 0.98  | 0.95  | 0.88  | 0.10  | 0.11  | 0.10  | 0.08  |

**Table S8.** Charges on the donor (S or O) and acceptor (O) atoms, and the corresponding charge differences ( $\Delta q$ ) between them in the  $S_1$  state, obtained from  $S_1(N)$ -optimized geometries with  $\omega$ B97XD functionals for **3TFs**.

| compound              | F-3TF | H-3TF | O-3TF | N-3TF |
|-----------------------|-------|-------|-------|-------|
| $q_{\text{donor}}$    | 0.33  | 0.30  | 0.26  | 0.18  |
| $q_{\text{acceptor}}$ | -0.66 | -0.67 | -0.69 | -0.70 |
| $\Delta q$            | 0.99  | 0.98  | 0.95  | 0.88  |

**Table S9.** The computed optical excitations and molecular orbital contributions with  $\omega$ B97XD functionals for **3TFs**.

| Compound | State | E (eV) | Wavelength (nm) | f      | Contribution | weight |
|----------|-------|--------|-----------------|--------|--------------|--------|
| H-3TF    | $S_1$ | 2.76   | 449.1           | 0.3006 | HOMO→LUMO    | 97%    |
|          | $S_2$ | 4.05   | 305.8           | 0.0227 | HOMO-4→LUMO  | 21%    |
|          |       |        |                 |        | HOMO-2→LUMO  | 45%    |
| F-3TF    | $S_1$ | 2.77   | 447.9           | 0.2992 | HOMO→LUMO    | 98%    |
|          | $S_2$ | 4.03   | 307.8           | 0.0187 | HOMO-3→LUMO  | 44%    |
|          |       |        |                 |        | HOMO-2→LUMO  | 21%    |
| O-3TF    | $S_1$ | 2.69   | 460.4           | 0.4184 | HOMO→LUMO    | 96%    |
|          | $S_2$ | 4.03   | 307.8           | 0.0746 | HOMO-4→LUMO  | 22%    |
|          |       |        |                 |        | HOMO-2→LUMO  | 27%    |
|          |       |        |                 |        | HOMO-1→LUMO  | 22%    |
| N-3TF    | $S_1$ | 2.74   | 451.9           | 0.7281 | HOMO→LUMO    | 94%    |
|          | $S_2$ | 4.01   | 309.1           | 0.2255 | HOMO-1→LUMO  | 64%    |
|          |       |        |                 |        | HOMO-3→LUMO  | 14%    |

**Table S10.** The  $cSAR(R'')$  value calculated with different functionals for **3TFs**.

| Functionals    | F-3TF | H-3TF | O-3TF | N-3TF |
|----------------|-------|-------|-------|-------|
| B3LYP          | 0.22  | 0.51  | 0.64  | 0.86  |
| CAM-B3LYP      | 0.24  | 0.32  | 0.59  | 0.73  |
| $\omega$ B97XD | -0.64 | 0.32  | 0.59  | 0.72  |

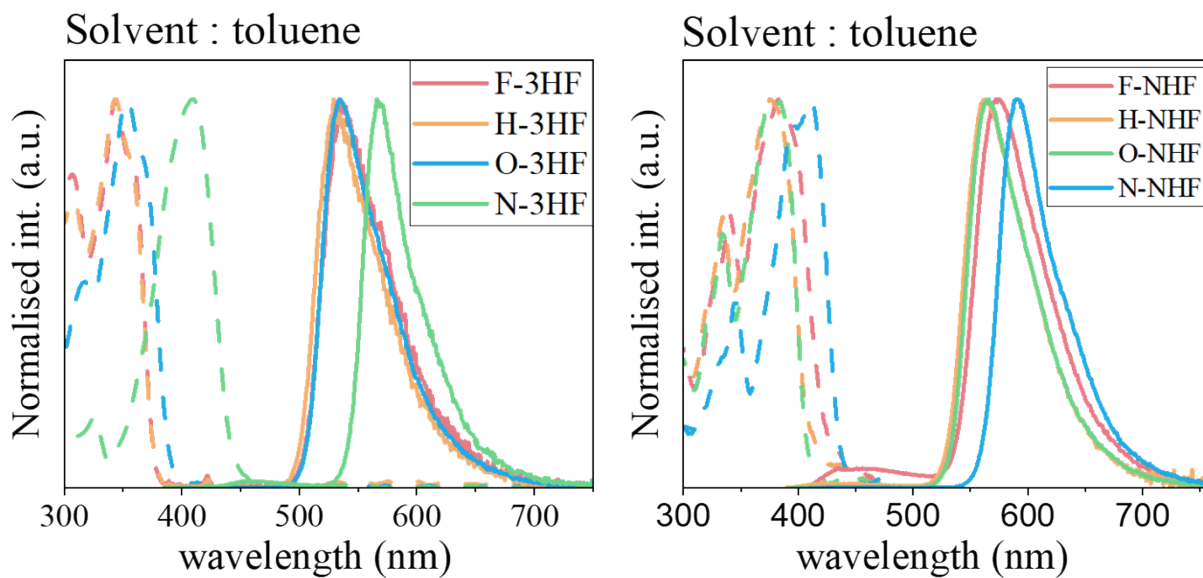

**Figure S14.** Steady spectra of **3HF**s (upper panel) and **NHF**s (lower panel). In the steady-state spectra, dashed lines represent absorption, while solid lines indicate emission. All measurements were performed in dilute toluene, with an excitation wavelength of the first absorption band.

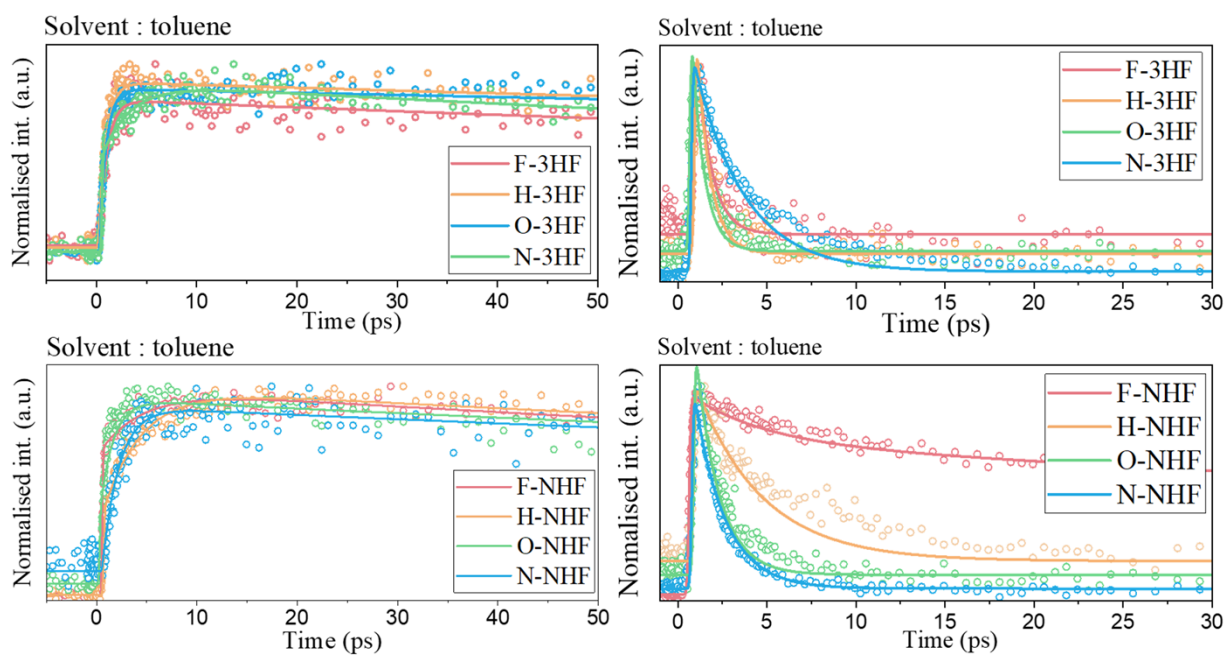

**Figure S15.** Kinetic spectra of **3HF**s (upper panel) and **NHF**s (lower panel). Kinetic spectra were obtained using the upconversion technique, monitored at the tautomer emission peak for each compound. All measurements were performed in dilute toluene, with an excitation wavelength of the first absorption band.

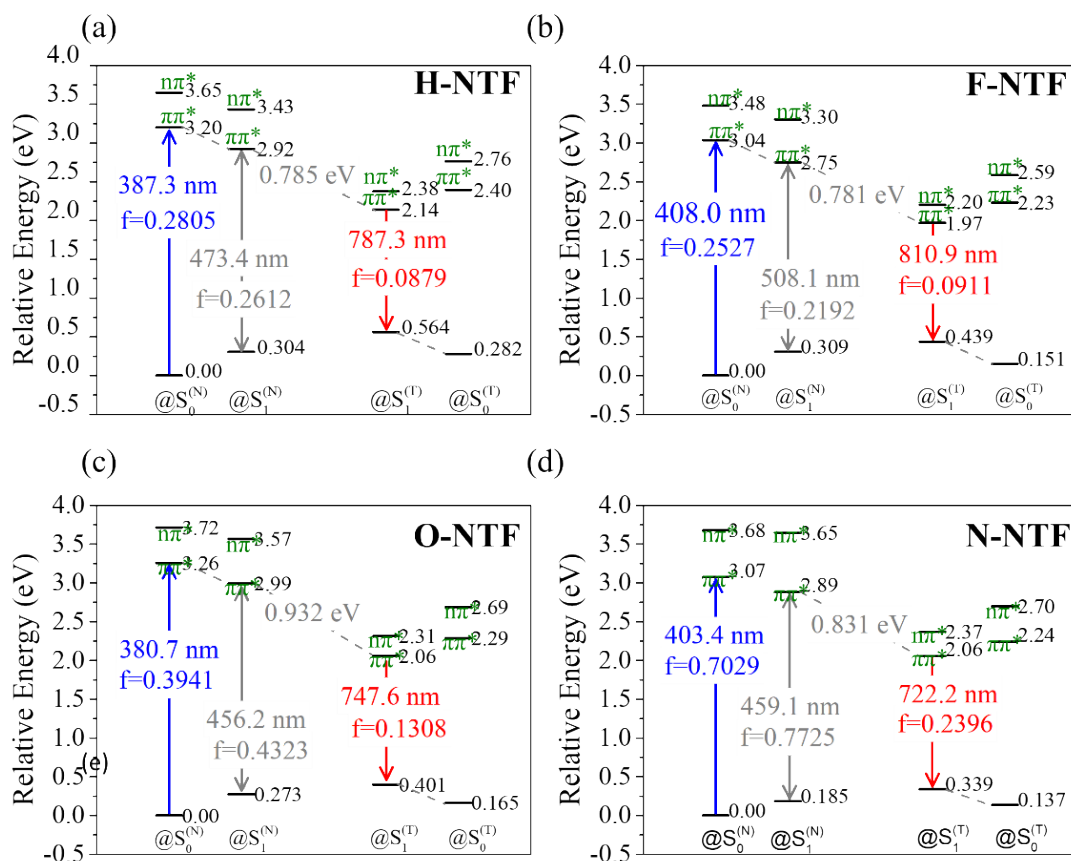

**Figure S16.** The calculated energy of the lower lying states and their corresponding electronic character for (a) H-NTF (b) F-NTF (c) O-NTF (d) N-NTF, where @S<sub>0</sub> (N), @S<sub>1</sub> (N) @S<sub>0</sub> (T) and @S<sub>1</sub> (T) denote the geometry optimized states at S<sub>0</sub> (N), S<sub>1</sub> (N) S<sub>0</sub> (T) and S<sub>1</sub> (T), respectively.

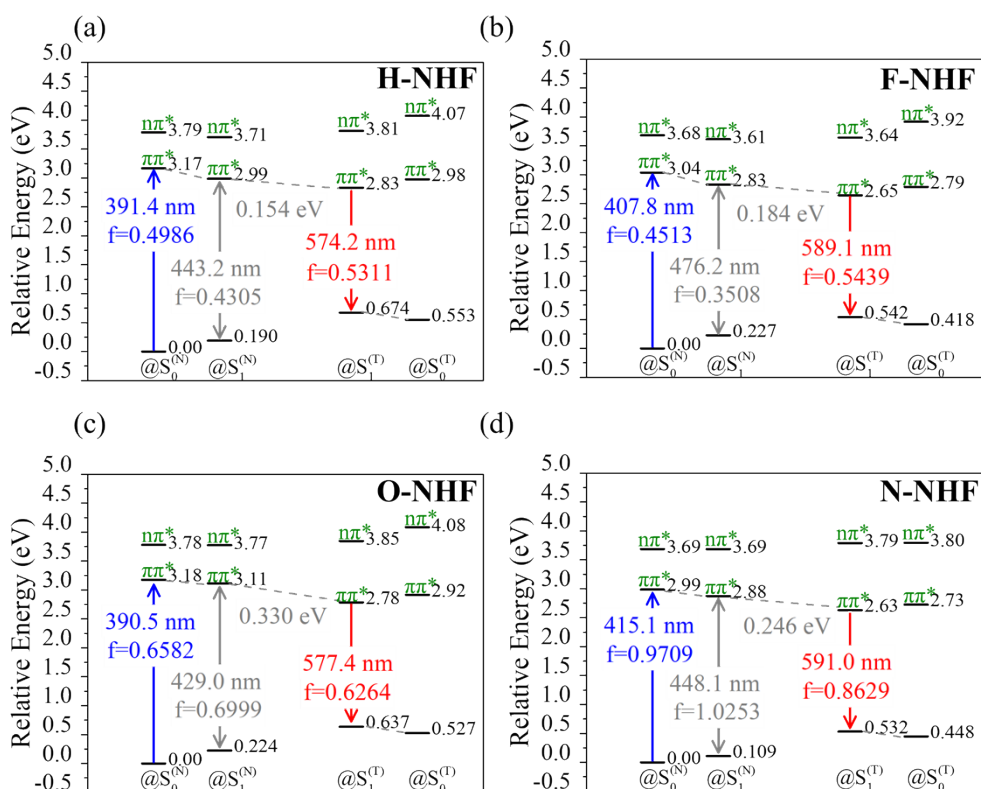

**Figure S17.** The calculated energy of the lower lying states and their corresponding electronic character for (a) H-NHF (b) F-NHF (c) O-NHF (d) N-NHF, where @S<sub>0</sub> (N), @S<sub>1</sub> (N) @S<sub>0</sub> (T) and @S<sub>1</sub> (T) denote the geometry optimized states at S<sub>0</sub> (N), S<sub>1</sub> (N) S<sub>0</sub> (T) and S<sub>1</sub> (T), respectively.

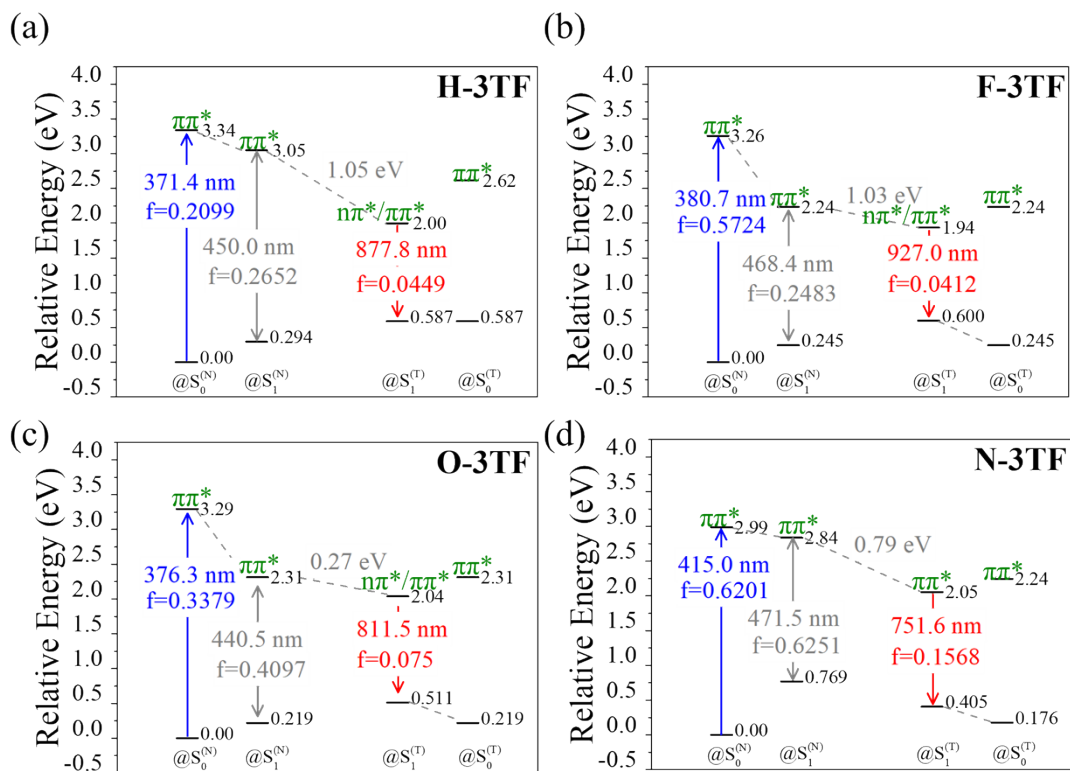

**Figure S18.** The calculated energy of the lower lying states and their corresponding electronic character for (a) H-3TF (b) F-3TF (c) O-3TF (d) N-3TF, where @S<sub>0</sub> (N), @S<sub>1</sub> (N) @S<sub>0</sub> (T) and @S<sub>1</sub> (T) denote the geometry optimized states at S<sub>0</sub> (N), S<sub>1</sub> (N) S<sub>0</sub> (T) and S<sub>1</sub> (T), respectively.

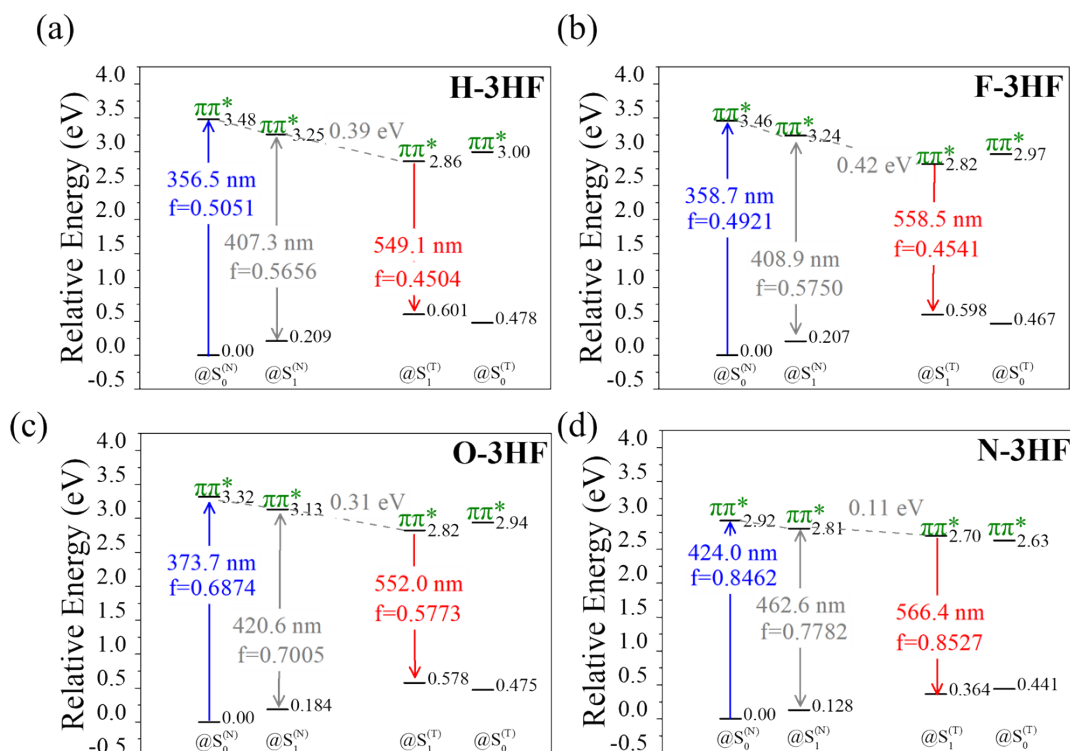

**Figure S19.** The calculated energy of the lower lying states and their corresponding electronic character for (a) H-3HF (b) F-3HF (c) O-3HF (d) N-3HF, where @S<sub>0</sub> (N), @S<sub>1</sub> (N) @S<sub>0</sub> (T) and @S<sub>1</sub> (T) denote the geometry optimized states at S<sub>0</sub> (N), S<sub>1</sub> (N) S<sub>0</sub> (T) and S<sub>1</sub> (T), respectively.

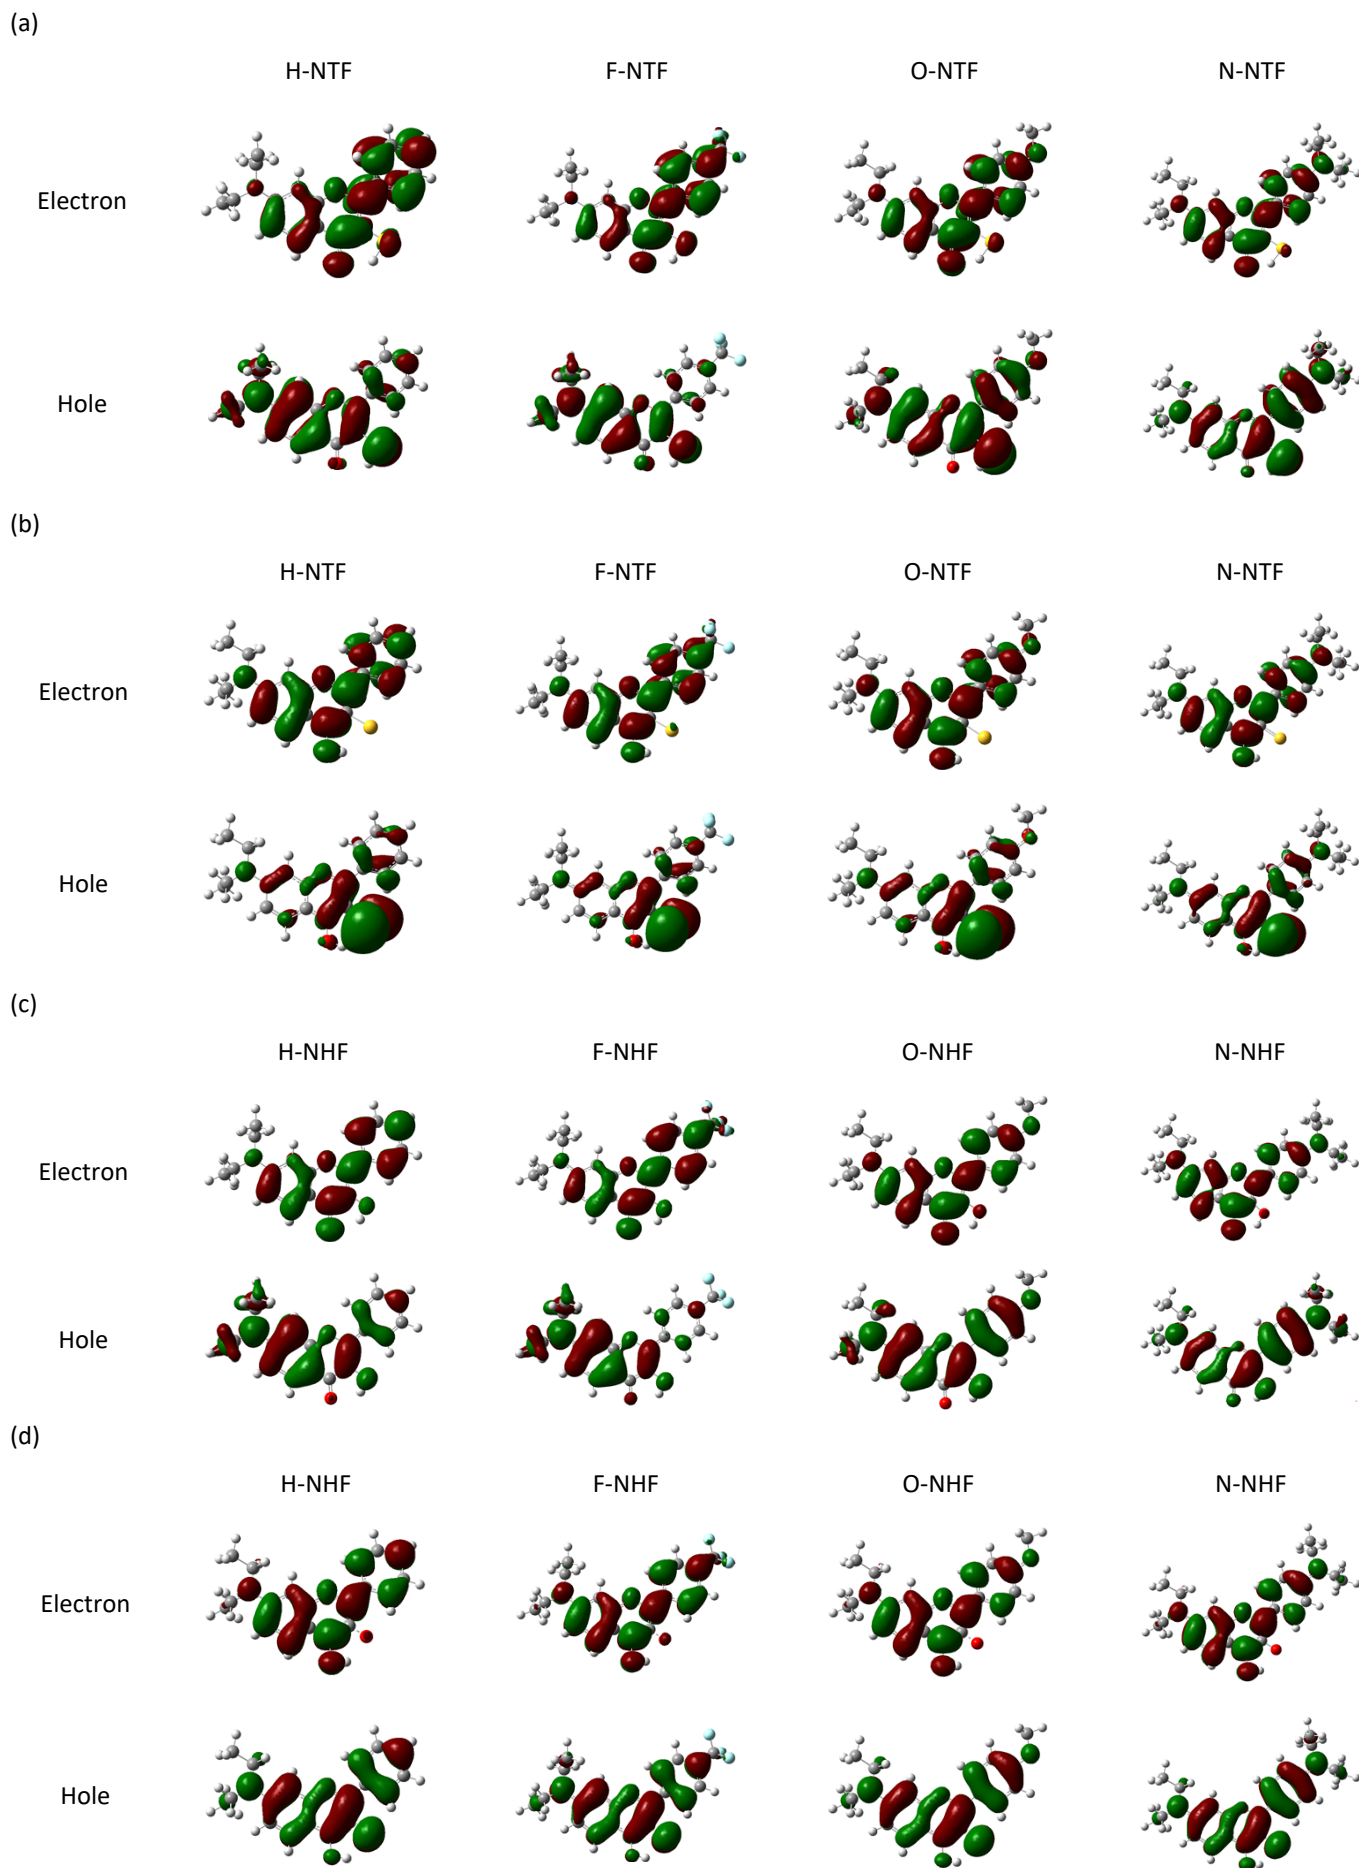

**Figure S20.** Frontier molecular orbitals corresponding to major optical transitions for (a) the normal form, (b) the tautomer form at the  $S_1$ -optimized structure of NTFs, (c) the normal form, and (d) the tautomer form at the  $S_1$ -optimized structure of NHFs.

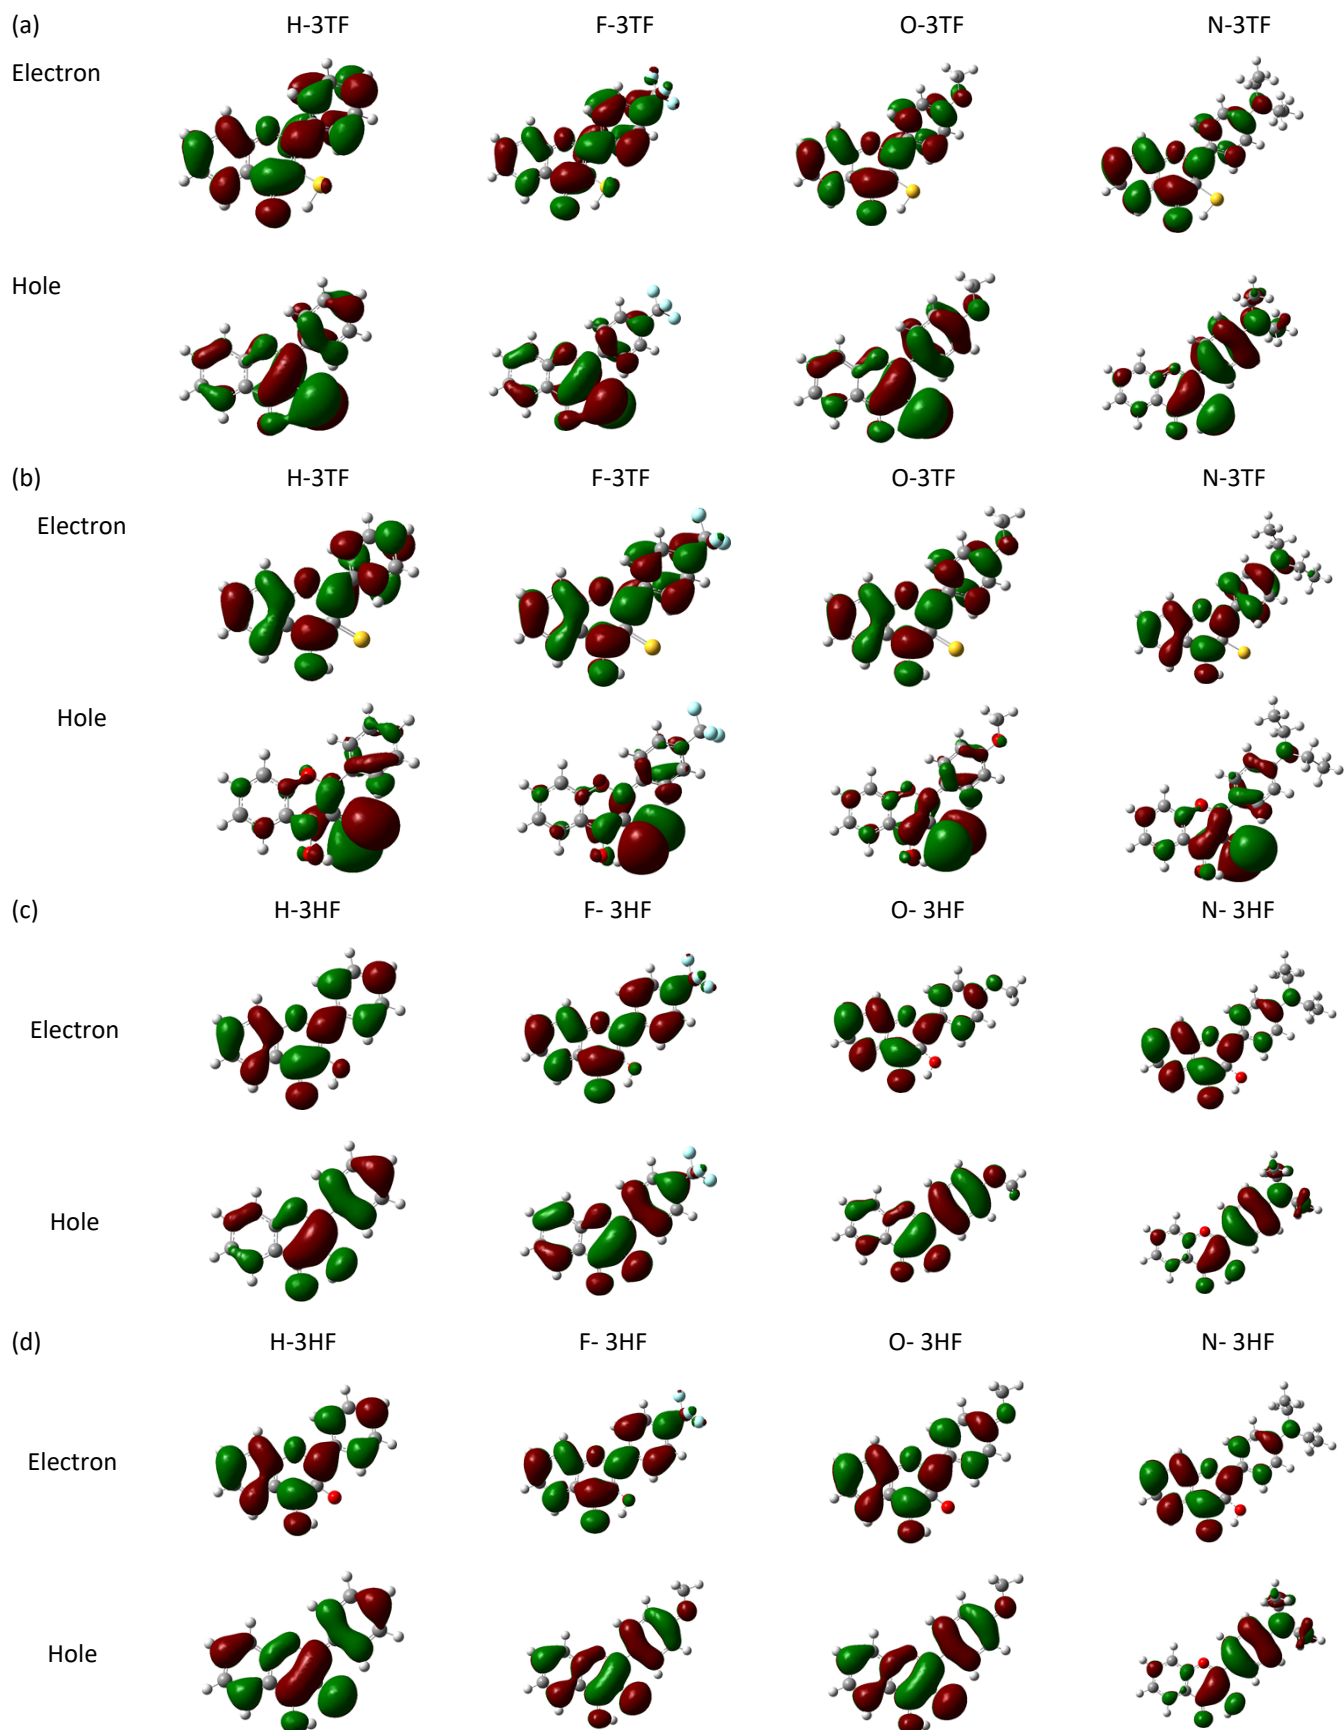

**Figure S21.** Natural transition orbitals of  $S_1$  for (a) the normal form at the  $S_1$ -optimized structure, (b) the tautomer form at the  $S_1$ -optimized structure of **3TFs**, (c) the normal form at the  $S_1$ -optimized structure, and (d) the tautomer form at the  $S_1$ -optimized structure of **3HFs**.

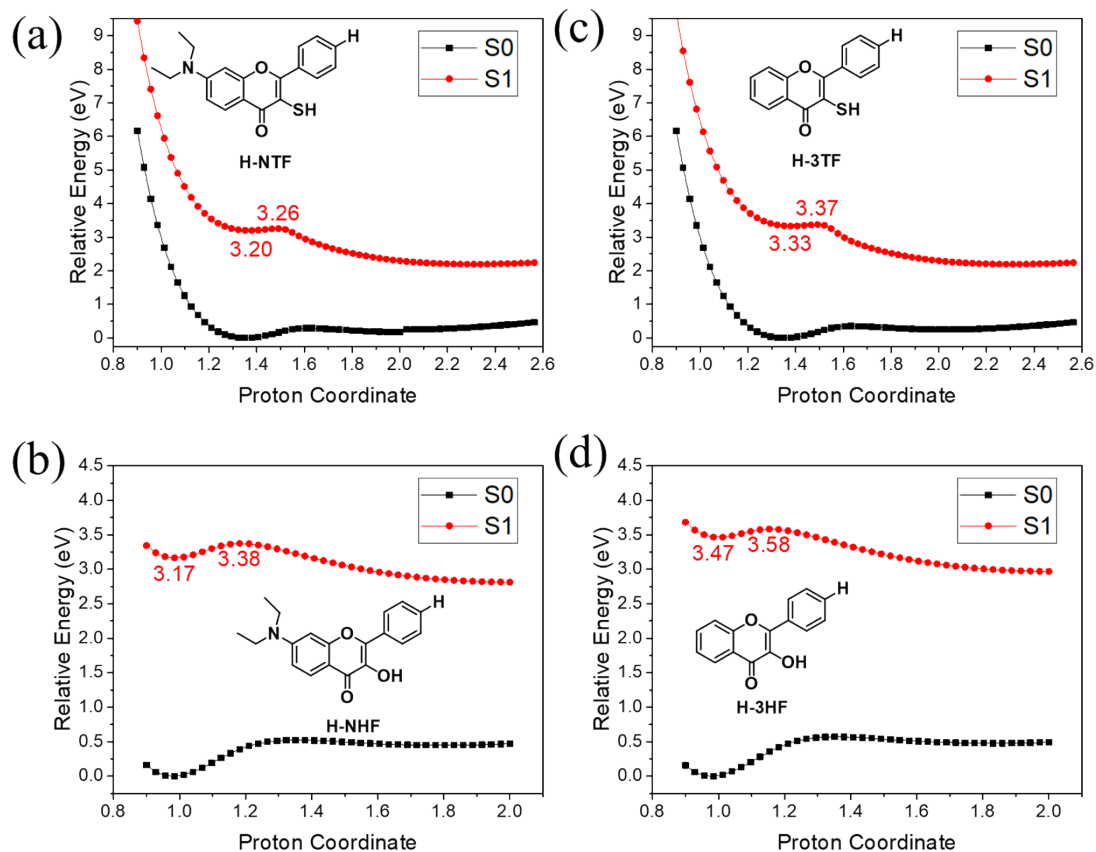

**Figure S22.** The potential energy surfaces of S0 and S1 along the proton coordinate in (a) H-NTF, (b) H-NHF, (c) H-3TF, and (d) H-3HF.

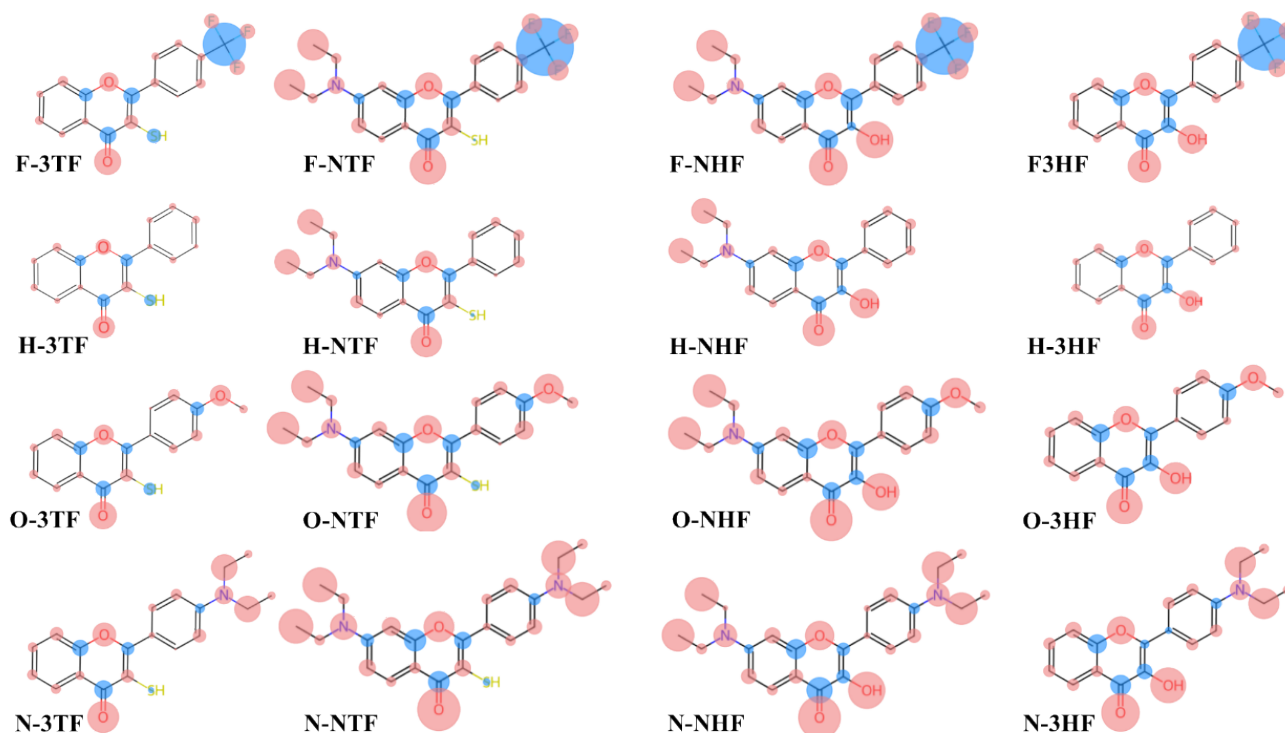

**Figure S23.** Visualization of Natural Population Analysis (NPA) atomic charges across ESIP systems. Red spheres denote negative partial charges and blue spheres denote positive partial charges; sphere radius scales with charge magnitude. The figure highlights the charge redistribution patterns induced by different substituents and the contrasting behavior between sulfur- and oxygen-based donors.

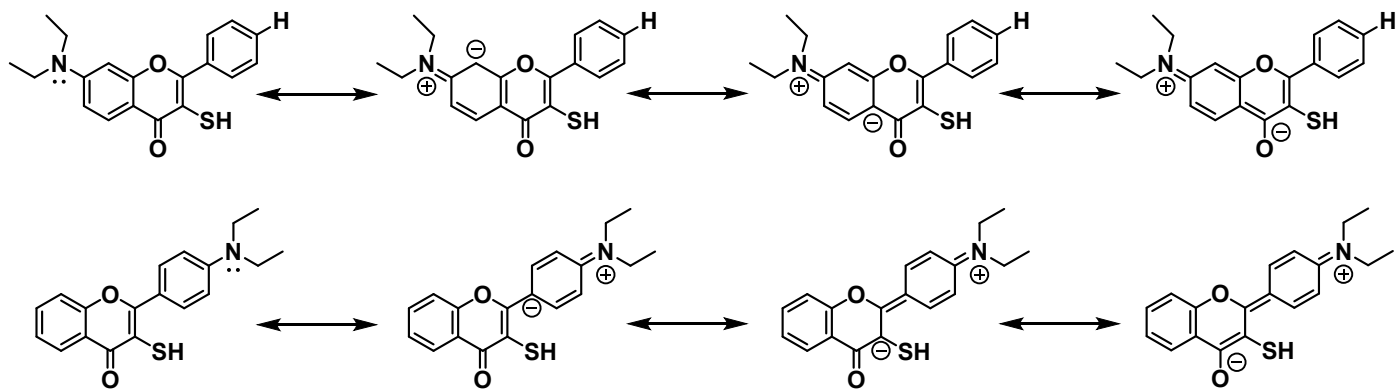

**Figure S24.** Schematic depiction of the resonance mechanism by which substituents modulate  $\pi$ -electron density across 7-N,N-diethylamino-substituted scaffold (NTFs and NHFs) and 3-scaffold (3TFs and 3HFs) flavonoids, influencing ESIPT donor and acceptor sites.

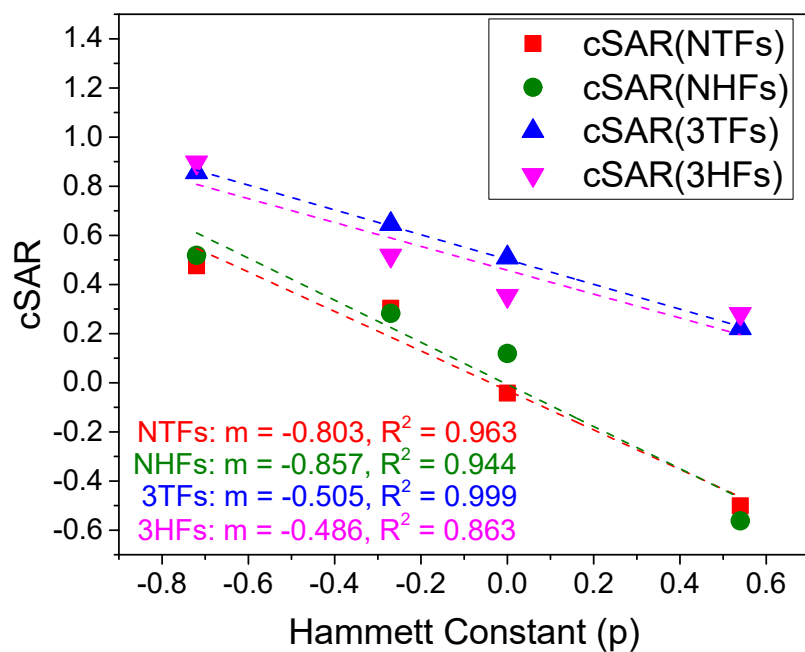

**Figure S25.** classical para-Hammett constants ( $\rho$ , here stands for  $\sigma_p$ ) alongside the cSAR descriptors of all compounds.

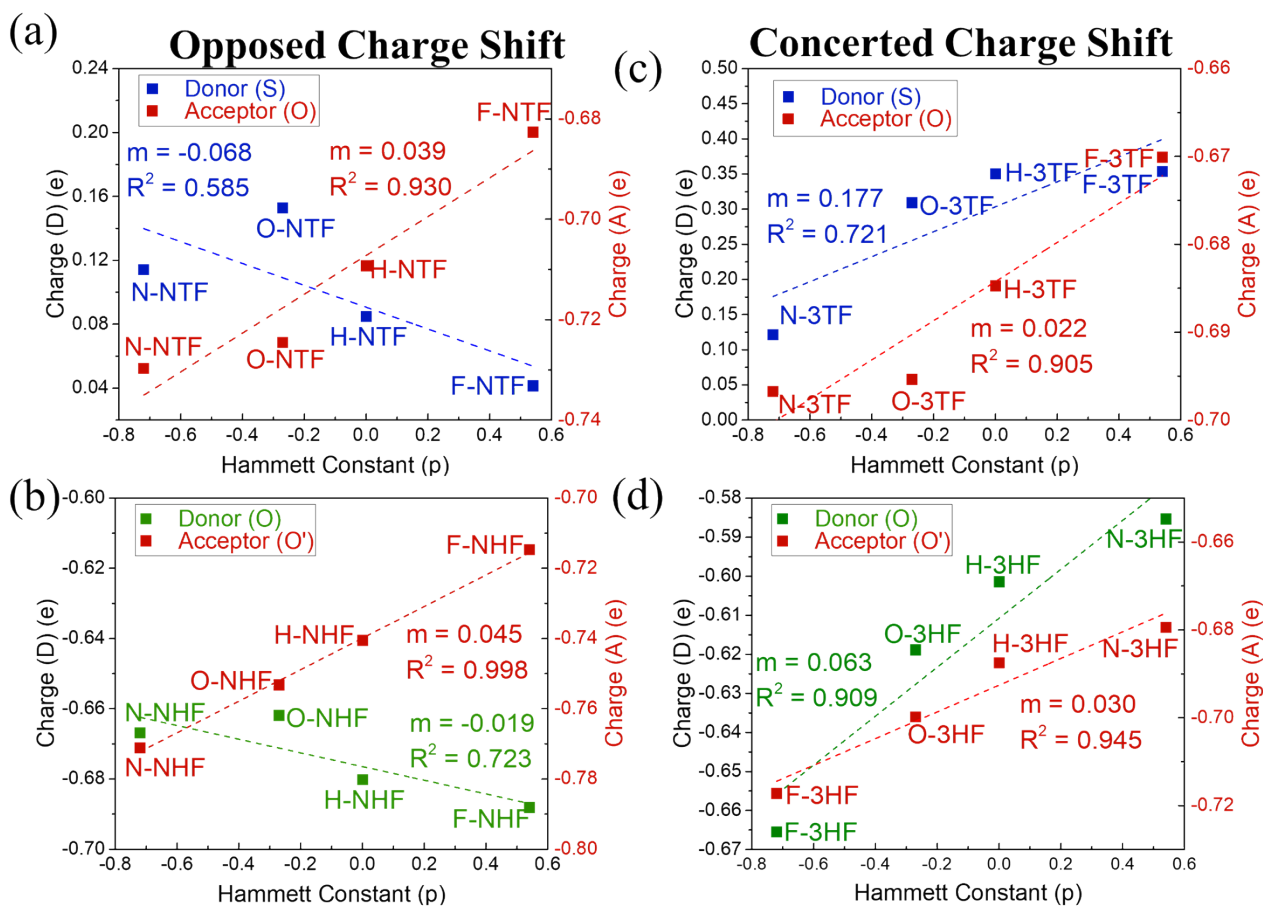

**Figure S26.** Correlation between the Hammett constant ( $\rho$ ) and Natural Population Analysis (NPA) charges on the ESIPT donor and acceptor atoms across four flavonoid scaffolds: (a) NTFs, (b) NHFs, (c) 3TFs, and (d) 3HFs of  $S_1$ -optimized structures. Donor atoms (S or O) are shown in blue or green; acceptor atoms (O or O') are in red. Dashed lines represent linear fits with corresponding slopes ( $m$ ) and  $R^2$  values.

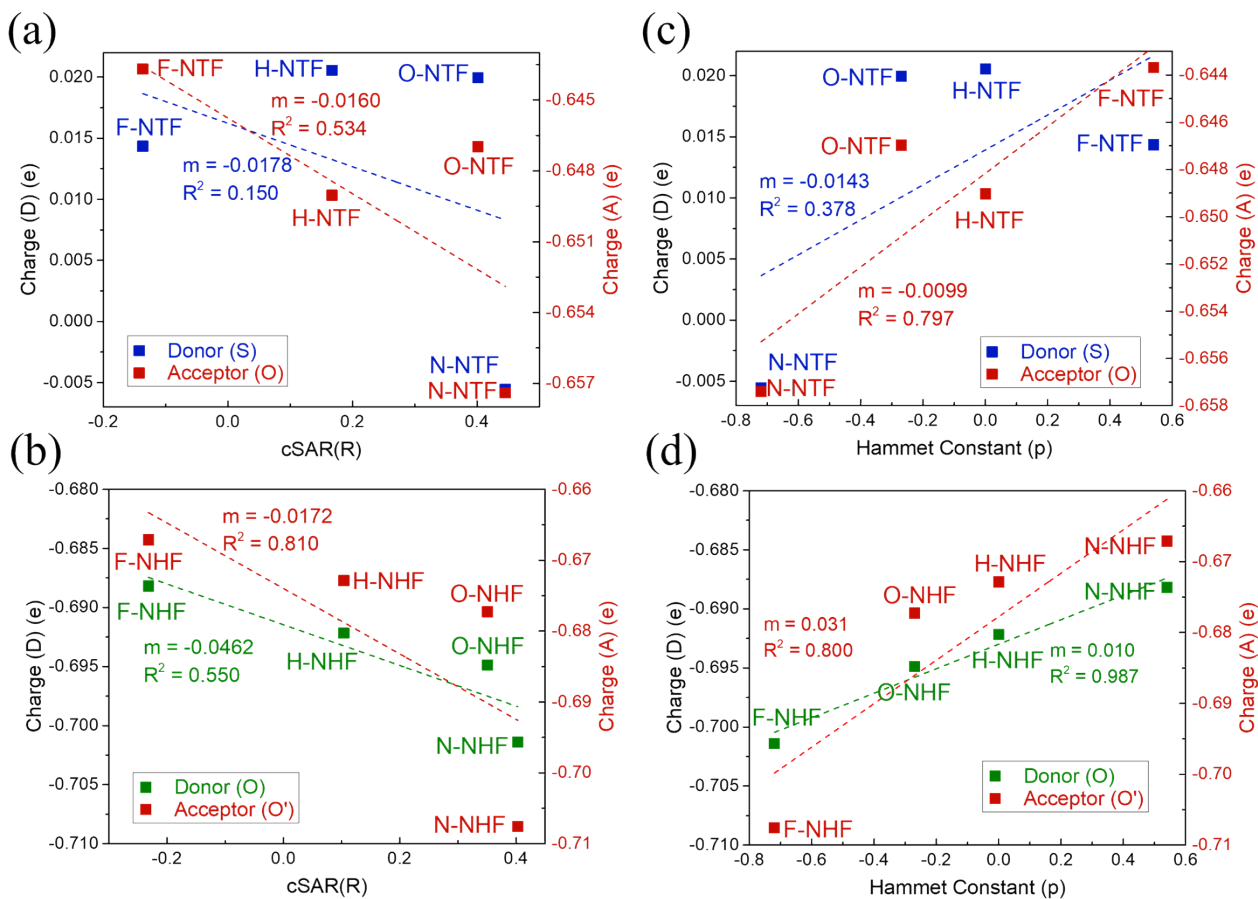

**Figure S27.** Correlation plots between the charge of the substituent active region (cSAR) and Natural Population Analysis (NPA) charges for (a) NTFs and (b) NHFs, and between Hammett constants ( $\sigma_p$ ) and NPA charges for (c) NTFs and (d) NHFs of  $S_0$ -optimized structures. Donor atoms (S or O) are shown in blue or green, and acceptor atoms (O or O') in red. Dashed lines represent linear regressions with the corresponding slopes ( $m$ ) and  $R^2$  values.

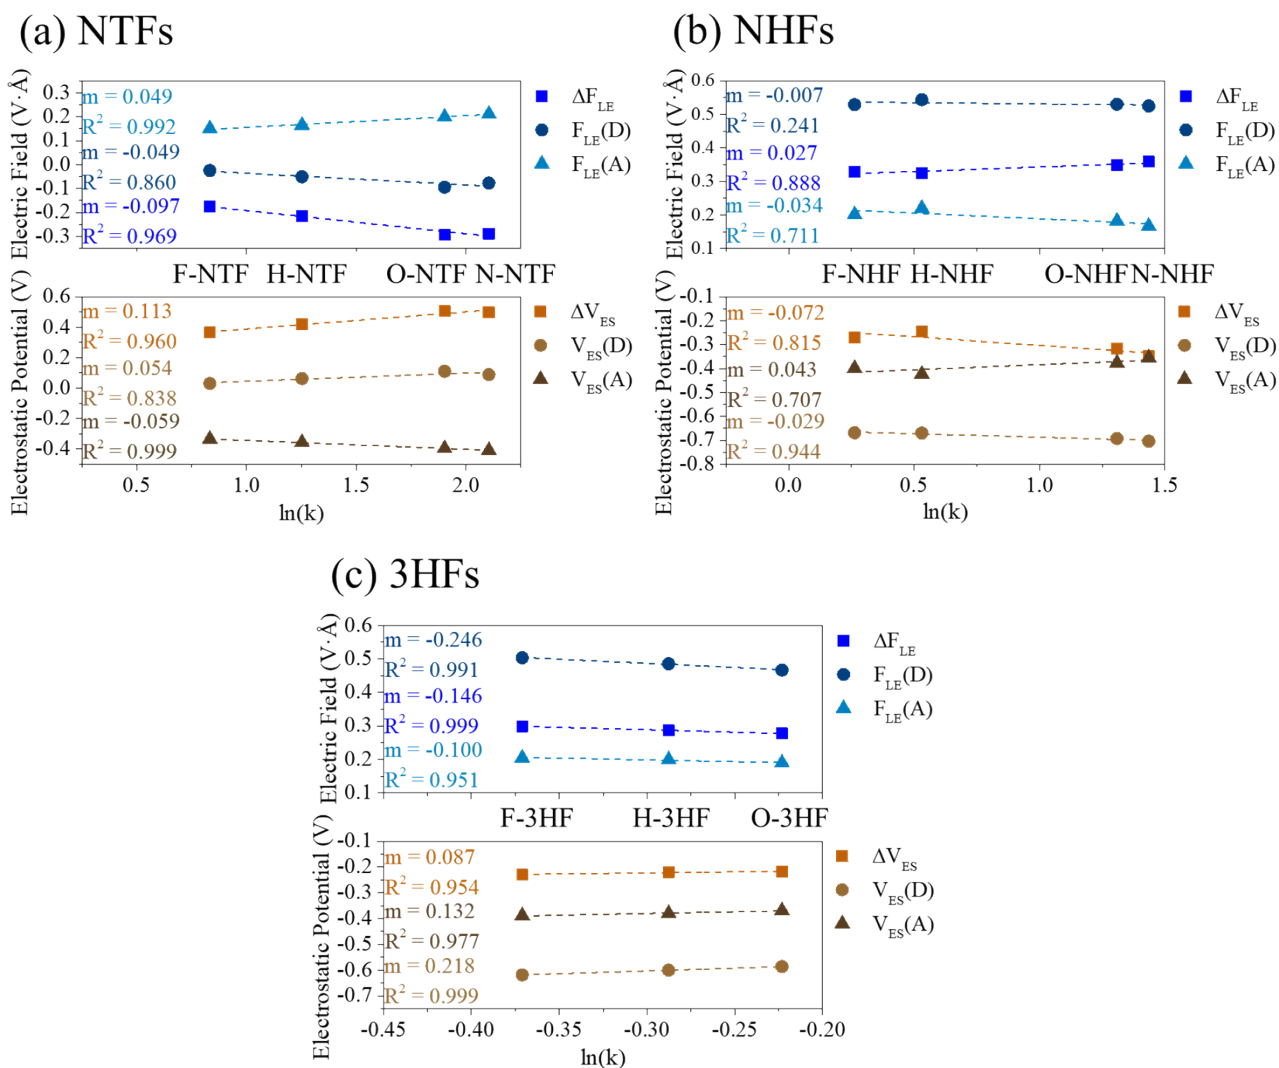

**Figure S28.** Correlation plots between local electrostatic descriptors and the logarithmic proton-transfer rate constant. Blue and brown schemes represent local electric field ( $\Delta F_{LE}$ ) and electrostatic potential ( $\Delta V_{ES}$ ) descriptors, respectively. Plots show linear relationships between  $\Delta F$  or  $\Delta V$  and  $\ln(k)$  values in the  $S_1$  state for **NTFs**, **NHFs**, and **3HFs**. Here,  $k$  denotes the proton-transfer rate constant ( $k_{PT}$ ). Linear regression slopes ( $m$ ) and coefficients of determination ( $R^2$ ) are indicated. **3TFs** were excluded due to the absence of tautomer emission.
